# Supplementary material for: Composite sequence proteomic analysis of protein biomarkers of Campylobacter coli, C. lari and C. concisus for bacterial identification
Source: Royal Society of Chemistry journal article supplement (doi:10.1039/b702859h), 2007-01-01
Supplement: b702859h.pdf [file b702859h.pdf]

# **Composite Sequence Proteomic Analysis of Protein Biomarkers of *Campylobacter coli*, *C. lari* and *C. concisus* for Bacterial Identification**

Clifton K. Fagerquist, Emma Yee and William G. Miller

*Western Regional Research Service, Agricultural Research Service, U. S. Department of  
Agriculture, 800 Buchanan Street, Albany, California 94710.*

## **Supplementary Information**

Amplification and gene sequencing of selected protein biomarkers whose amino acid sequence was determined by Composite Sequence Proteomic Analysis (CSPA)

### RM1051 'phnA'

**Nucleotide sequence (NCBI accession number: EF643696)**

ATGCCTAAAGATGCAAATGGAACAGAAATTAATGCTGGAGATAGCGTAAGCGTGAT  
AAAAGATTTAAAAGTTAAAGGTGCTAGCACTACTTTAAAACGCGGAACAACGATAA  
AAAATATCAAACCTTACTTCTAAAGAAAATGAAATTGAAGCTAAAGTAGATAAATTT  
GGCGTTATTGTACTAAAGACTGAATTTTTAAAGAAAATTTAG

**Amino acid sequence**

MPKDANGTELNAGDSVSVIKDLKVKGASTTLKRGTTIKNIKLTSKENEIEAKVDFKFGVIV  
LKTEFLKKI    **Average MW = 7503.8**

### RM1865 'phnA'

**Nucleotide sequence (NCBI accession number: EF643697)**

ATGCCTAAAGATGCAAATGGAACAGAAATTAATGCTGGAGATAGCGTAAGCGTGAT  
AAAAGATTTAAAAGTTAAAGGTGCTAGCACTACTTTAAAACGCGGAACAACGATAA  
AAAATATCAAACCTTACTTCTAAAGAAGGTGAAATTGAAGCCAAAGTAGATAAATTT  
GGCGTTATTGTACTAAAGACTGAATTTTTAAAGAAAATTTAG

**Amino acid sequence**

MPKDANGTELNAGDSVSVIKDLKVKGASTTLKRGTTIKNIKLTSKERGEIEAKVDFKFGVIV  
LKTEFLKKI    **Average MW = 7446.8**

RM1051 30S ribosomal S15 (*rpsO*)

**Nucleotide sequence (NCBI accession number: EF643698)**

ATGGCTTTGGATTTCGGCTAAAAAAGCAGAAATTGTTGCGAAATTCGCTAGAAAAGC  
GGGCGATACTGGCTCGACAGAAGTTCAAGTAGCACTTTTAAGTGCAAGAATTGCAG  
AACTTACAGAACATTTAAAAATCTACAAAAAAGATTTTCTTCAAGATTAGGACTTT  
TAAAACCTTGTAGGTCAAAGAAAAAGACTTTTAGCTTATCTAAAAAGAAAAGATTAC  
AATTCTTATAGTAAATTAATTACAGAATTAATCTCAGAGATAAATAA

**Amino acid sequence**

MALDSAKKAEIVAKFARKAGDTGSTEVQVALLSARIAELTEHLKIYKKDFSSRLGLLKL  
VGQRKRLAYLKRKDYNSYSKLITELNLRDK **Average MW = 10198.0**

RM1865 30S ribosomal S15 protein (*rpsO*)

**Nucleotide sequence (NCBI accession number: EF643699)**

ATGGCTTTGGATTTCGGCTAAAAAAGCAGAAATTGTTGCGAAATTCGCTAGAAAAGC  
GGGCGATACTGGCTCGACAGAAGTTCAAGTAGCACTTTTAAGTGCGAGAATTGCAG  
AACTTACAGAACATTTAAAAATCTACAAAAAAGATTTTCTTCAAGATTAGGACTTT  
TAAAACCTTGTAGGTCAAAGAAAAAGACTTTTAGCTTATCTAAAAAGAAAAGATTAC  
AATTCTTATAGTAAATTAATTACAGAATTAATCTTAGAGATAAATAA

**Amino acid sequence**

MALDSAKKAEIVAKFARKAGDTGSTEVQVALLSARIAELTEHLKIYKKDFSSRLGLLKL  
VGQRKRLAYLKRKDYNSYSKLITELNLRDK

## Proteomic Identifications

Data files of tandem mass spectrometry data were analyzed using both MASCOT and GPM software. MASCOT search engine parameters were as follows. The database was the non-redundant National Center for Biotechnology Information (NCBI nr) with a taxonomy of eubacteria. As many as five missed cleavages were allowed. Carbamidomethylation of cysteine was a fixed modification, and methionine oxidation was a variable modification. Highlight at C indicates carbamidomethyl derivative, at Q deamidation and at M oxidation. The peptide error was  $\pm 1.2$  Da and fragment ion error was 0.6 Da. The charge of the precursor ion was allowed to be: +1, +2, +3. The file format output was Mascot generic. GPM search engine parameters were as follows. The precursor ion error was  $\pm 100$  ppm, with the fragment ion mass error of 0.4 Da. Carbamidomethylation of cysteine was a fixed modification, and methionine oxidation was a

variable modification. Similarly, as many as five missed cleavages were allowed. The charge of the precursor ion was +1 to +5.

When necessary, tandem mass spectrometry data was analyzed using commercially available *de novo* sequencing software (PEAKS, Bioinformatics Solutions Inc., Version 4.0). The *de novo* analysis parameters were as follows. The parent ion mass error was  $\pm 0.2$  Da. Fragment ion error was  $\pm 0.2$  Da. A fixed modification of carbamidomethylation of cysteine and a variable modification methionine oxidation were used.

## *Campylobacter coli*

### RM2228 Protein Biomarkers

Mascot-RM2228 hplc#33 gs1

Score: 326 Queries matched: 10

Ribosomal protein L24 [*Campylobacter coli* RM2228]

1 MAVKLIKIK**KGDSVKVITGDDK**GK**TLKVLAVY**PKTLKVVVEGCKIAK**KA**IK  
51 **PSEKNPN**GGF**IN**K**EM**PMDIS**NA**KVQE

| Observed Mr(expt) | Mr(calc) | Delta   | Miss  | Score | Expect | Rank | Peptide                            |
|-------------------|----------|---------|-------|-------|--------|------|------------------------------------|
| 317.17            | 632.32   | 632.35  | -0.03 | 1     | 36     | 2.6  | 1 K.KGDSVK.V                       |
| 374.19            | 746.37   | 746.38  | -0.01 | 0     | 49     | 0.11 | 1 K.VITGDDK.G                      |
| 395.24            | 788.47   | 788.48  | -0.01 | 0     | (27)   | 23   | 1 K.VLAVYPK.T                      |
| 395.68            | 789.34   | 788.48  | 0.86  | 0     | 38     | 1.6  | 1 K.VLAVYPK.T                      |
| 450.76            | 899.51   | 899.54  | -0.03 | 1     | 48     | 0.16 | 1 K.KAIKPSEK.N                     |
| 466.75            | 931.48   | 931.50  | -0.02 | 1     | 49     | 0.13 | 1 K.VITGDDK.GK.T                   |
| 480.72            | 959.42   | 959.48  | -0.06 | 0     | 44     | 0.35 | 1 K.NPNNGGFINK.E                   |
| 960.49            | 959.48   | 959.48  | -0.00 | 0     | (41)   | 0.84 | 1 K.NPNNGGFINK.E                   |
| 633.76            | 1265.51  | 1265.56 | -0.05 | 0     | 26     | 16   | 1 K.EMPMDISNAK.V + 2 Oxidation (M) |
| 571.97            | 1712.88  | 1712.92 | -0.04 | 1     | 37     | 1.9  | 1 K.AIKPSEKNPNNGGFINK.E            |

GPM-RM2228 hplc#33 gs1

$\log(e) = -37.7$

RM2228 rplX [50S ribosomal protein L24]

1 MAVKLIKIKKGDSVKVITGDDK**GKTLKVLAVY**PKTLK**VVVEGCKIAKKA**IK**PSEKNPN**GGF 60  
61 **IN**K**EM**PMDIS**NA**KVQE 77

| spectrum | log(e) | log(I) | m+h      | delta  | z | sequence                                               |
|----------|--------|--------|----------|--------|---|--------------------------------------------------------|
| 29.1     | -2.6   | 4.59   | 789.488  | -0.032 | 2 | ktgk <sup>27</sup> VLAVYPK <sup>33</sup> tlkv          |
| 14.1     | -1.4   | 4.23   | 790.402  | -0.049 | 2 | ktlk <sup>37</sup> VVVEGK <sup>43</sup> iakk           |
| 18.1     | -1.2   | 3.82   | 900.552  | -0.034 | 2 | kiak <sup>47</sup> KAIKPSEK <sup>54</sup> npng         |
| 28.1     | -2.5   | 3.31   | 1713.930 | -0.048 | 3 | iakk <sup>48</sup> AIKPSEKNPNGGFINK <sup>63</sup> empm |
| 26.1     | -2.1   | 3.08   | 846.448  | -0.017 | 2 | sekn <sup>56</sup> PNGGFINK <sup>63</sup> empm         |
| 20.1     | -1.0   | 4.16   | 1266.582 | -0.073 | 2 | fink <sup>64</sup> EMPMDISNVAK <sup>74</sup> vqe]      |
| 21.1     | -1.8   | 2.84   | 990.499  | -0.034 | 2 | nkem <sup>66</sup> PMDISNVAK <sup>74</sup> vqe]        |

Mascot-RM2228 hplc#54 gs1

Score: 314 Queries matched: 11

Probable Periplasmic Cytochrome C Cj1153 [Campylobacter coli RM2228]

1 MKKLLVVSALACLGVSFAADGATLFKKCAVCHGAK**ADKVYLNKVPALKS**

51 **ISSAERLQYMK**EYSEGKR**NAYGQGAIMKINLK**GLTEEDFK**AIEAYIETL**

| Observed Mr(expt) | Mr(calc) | Delta   | MissScore | Expect | Rank | Peptide                             |
|-------------------|----------|---------|-----------|--------|------|-------------------------------------|
| 264.17            | 526.32   | 526.35  | -0.03     | 0      | 24   | 2.3 1 K.VPALK.S                     |
| 318.68            | 635.34   | 635.36  | -0.02     | 0      | 19   | 1e+002 4 K.VYLNK.V                  |
| 356.65            | 711.28   | 711.31  | -0.03     | 0      | 15   | 1.3e+002 6 K.EYSEGK.R               |
| 375.17            | 748.33   | 748.37  | -0.04     | 0      | 21   | 64 7 K.SISSAER.L                    |
| 434.70            | 867.38   | 867.41  | -0.03     | 1      | 40   | 0.61 1 K.EYSEGKR.N                  |
| 469.72            | 937.42   | 937.44  | -0.02     | 0      | 35   | 2.2 1 K.GLTEEDFK.A                  |
| 475.75            | 949.49   | 949.52  | -0.03     | 1      | 43   | 0.39 1 K.ADKVYLNK.V                 |
| 511.75            | 1021.49  | 1021.53 | -0.04     | 0      | 25   | 25 6 K.AIEAYIETL.-                  |
| 534.75            | 1067.48  | 1067.51 | -0.03     | 0      | 20   | 70 5 R.NAYGQGAIMK.I + Oxidation (M) |
| 382.23            | 1143.66  | 1143.70 | -0.04     | 1      | 43   | 0.52 1 K.VYLNKVPALK.S               |
| 486.94            | 1457.81  | 1457.86 | -0.06     | 2      | 29   | 12 1 K.ADKVYLNKVPALK.S              |

GPM-RM2228 hplc#54 gs1

log(e) = -12.0

RM\_2228\_Cc1095\_[Cytochrome-  
 related\_conserved\_hypothetical\_protein,\_similar\_to\_C.\_jejunii\_CJ1153]

1 MKKLLVVSALACLGVSFAFA**ADGATLFK**KCAVCHGAK**ADKVYLNKVPALK**SISSAERLQYM 60  
 61 **KEYSEGKR**NAYGQGAIMKINLK**GLTEEDFK**AIEAYIETL 99

| spectrum | log(e) | log(I) | m+h      | delta  | z | sequence                                            |
|----------|--------|--------|----------|--------|---|-----------------------------------------------------|
| 32.1     | -2.3   | 3.19   | 822.437  | -0.029 | 2 | safa <sup>20</sup> ADGATLFK <sup>27</sup> kcaV      |
| 33.1     | -2.5   | 2.58   | 1458.869 | -0.051 | 3 | hgak <sup>37</sup> ADKVYLNKVPALK <sup>49</sup> sisS |
| 29.1     | -1.8   | 3.36   | 938.448  | -0.033 | 2 | inlk <sup>83</sup> GLTEEDFK <sup>90</sup> aiea      |

Mascot-RM2228 hplc#69 gs1

Score: 590 Queries matched: 20

Thioredoxin [*Campylobacter coli* RM2228]

1 MGKYIELTSDNFAQAKEGVALVDFWAPWCGPCRMLAPVIDELANDFDGKA  
 51 KICKVNTDEQGDLAAEFGVRSIPTLIFFKNGEVVDQLVGAQSKQAISDKL  
 101 NSLL

| Observed | Mr(expt) | Mr(calc) | Delta | Miss | Score | Expect   | Rank | Peptide                                |
|----------|----------|----------|-------|------|-------|----------|------|----------------------------------------|
| 559.29   | 558.28   | 558.34   | -0.06 | 0    | 12    | 5.1e+002 | 9    | K.LNSLL.-                              |
| 310.17   | 618.32   | 618.35   | -0.03 | 1    | 20    | 1e+002   | 8    | K.AKICK.V                              |
| 331.17   | 660.32   | 660.34   | -0.03 | 0    | 35    | 3.8      | 1    | K.QAISDK.L                             |
| 533.29   | 1064.57  | 1064.63  | -0.05 | 0    | (32)  | 5.3      | 1    | R.SIPTLIFFK.N                          |
| 533.30   | 1064.59  | 1064.63  | -0.03 | 0    | 37    | 1.7      | 1    | R.SIPTLIFFK.N                          |
| 533.31   | 1064.61  | 1064.63  | -0.01 | 0    | (31)  | 6.3      | 1    | R.SIPTLIFFK.N                          |
| 601.30   | 1200.58  | 1200.67  | -0.09 | 1    | (15)  | 3e+002   | 7    | K.QAISDKLNSLL.-                        |
| 1201.65  | 1200.64  | 1200.67  | -0.03 | 1    | 34    | 3.6      | 2    | K.QAISDKLNSLL.-                        |
| 722.34   | 1442.67  | 1442.74  | -0.07 | 0    | 71    | 0.00071  | 1    | K.NGEVVDQLVGAQSK.Q                     |
| 481.91   | 1442.71  | 1442.74  | -0.03 | 0    | (30)  | 8.9      | 1    | K.NGEVVDQLVGAQSK.Q                     |
| 750.32   | 1498.62  | 1498.73  | -0.11 | 0    | 62    | 0.0055   | 1    | K.YIELTSDNFAQAK.E                      |
| 750.70   | 1499.39  | 1498.73  | 0.66  | 0    | (57)  | 0.013    | 1    | K.YIELTSDNFAQAK.E                      |
| 562.26   | 1683.77  | 1683.85  | -0.08 | 1    | 58    | 0.014    | 1    | M.GKYIELTSDNFAQAK.E                    |
| 860.86   | 1719.70  | 1719.81  | -0.11 | 0    | 75    | 0.00024  | 1    | K.VNTDEQGDLAAEFGVRS                    |
| 582.94   | 1745.78  | 1746.85  | -1.07 | 0    | (53)  | 0.046    | 1    | R.MLAPVIDELANDFDGK.A                   |
| 882.40   | 1762.79  | 1762.84  | -0.06 | 0    | (70)  | 0.00082  | 1    | R.MLAPVIDELANDFDGK.A + Oxidation (M)   |
| 588.70   | 1763.08  | 1762.84  | 0.23  | 0    | (57)  | 0.017    | 1    | R.MLAPVIDELANDFDGK.A + Oxidation (M)   |
| 882.90   | 1763.79  | 1762.84  | 0.95  | 0    | 77    | 0.00017  | 1    | R.MLAPVIDELANDFDGK.A + Oxidation (M)   |
| 654.98   | 1961.92  | 1961.98  | -0.06 | 1    | 49    | 0.098    | 1    | R.MLAPVIDELANDFDGKAK.I + Oxidation (M) |
| 1010.44  | 2018.86  | 2018.91  | -0.05 | 0    | 61    | 0.0064   | 1    | K.EGVALVDFWAPWCGPCR.M                  |

GPM-RM2228 hplc#69 gs1

log(e) = -61.8

RM2228 trx [Thioredoxin]

1 MGKYIELTSDNFAQAKEGVALVDFWAPWCGPCRMLAPVIDELANDFDGKAKICKVNTDEQ 60  
 61 GDLAAEFGVRSIPTLIFFKNGEVVDQLVGAQSKQAISDKLNSSL 104

| spectrum | log(e) | log(I) | m+h      | delta  | z | sequence                                                 |
|----------|--------|--------|----------|--------|---|----------------------------------------------------------|
| 42.1     | -1.3   | 3.51   | 1684.855 | -0.079 | 3 | [m <sup>2</sup> GKYIELTSDNFAQAK <sup>16</sup> egva       |
| 63.1     | -4.8   | 2.81   | 1499.739 | 0.653  | 2 | [mgk <sup>4</sup> YIELTSDNFAQAK <sup>16</sup> egva       |
| 70.1     | -4.5   | 2.71   | 1499.739 | 0.353  | 2 | [mgk <sup>4</sup> YIELTSDNFAQAK <sup>16</sup> egva       |
| 46.1     | -2.5   | 3.28   | 1499.739 | -0.040 | 2 | [mgk <sup>4</sup> YIELTSDNFAQAK <sup>16</sup> egva       |
| 44.1     | -2.4   | 4.31   | 1499.739 | -0.103 | 2 | [mgk <sup>4</sup> YIELTSDNFAQAK <sup>16</sup> egva       |
| 60.1     | -4.4   | 3.41   | 2019.898 | -0.032 | 2 | aqak <sup>17</sup> EGVALVDFWAPWCGPCR <sup>33</sup> m lap |
| 32.1     | -2.1   | 2.39   | 1003.402 | -0.014 | 2 | vdw <sup>26</sup> APWCGPCR <sup>33</sup> m lap           |
| 51.1     | -3.2   | 2.82   | 1962.990 | -0.065 | 3 | gpcr <sup>34</sup> MLAPVIDELANDFDGKAK <sup>51</sup> ickv |
| 80.1     | -3.6   | 2.74   | 1763.858 | -0.073 | 3 | gpcr <sup>34</sup> MLAPVIDELANDFDGK <sup>49</sup> akic   |
| 71.1     | -3.3   | 3.07   | 1763.858 | 0.941  | 2 | gpcr <sup>34</sup> MLAPVIDELANDFDGK <sup>49</sup> akic   |
| 58.1     | -3.1   | 4.79   | 1763.858 | -0.062 | 2 | gpcr <sup>34</sup> MLAPVIDELANDFDGK <sup>49</sup> akic   |
| 45.1     | -5.2   | 4.24   | 1720.815 | -0.117 | 2 | kick <sup>55</sup> VNTDEQGDLAAEFGVVR <sup>70</sup> sipt  |
| 47.1     | -4.9   | 3.20   | 1720.815 | -0.057 | 2 | kick <sup>55</sup> VNTDEQGDLAAEFGVVR <sup>70</sup> sipt  |
| 61.1     | -2.3   | 3.12   | 1065.635 | 0.470  | 2 | fgvr <sup>71</sup> SIPTLIFFK <sup>79</sup> ngev          |
| 55.1     | -2.2   | 4.54   | 1065.635 | -0.055 | 2 | fgvr <sup>71</sup> SIPTLIFFK <sup>79</sup> ngev          |
| 87.1     | -2.0   | 2.54   | 1065.635 | 0.231  | 2 | fgvr <sup>71</sup> SIPTLIFFK <sup>79</sup> ngev          |
| 56.1     | -1.6   | 4.29   | 865.519  | 0.305  | 2 | vrsi <sup>73</sup> PTLIFFK <sup>79</sup> ngev            |
| 67.1     | -1.2   | 2.85   | 865.519  | 0.359  | 2 | vrsi <sup>73</sup> PTLIFFK <sup>79</sup> ngev            |
| 54.1     | -1.1   | 4.61   | 865.519  | -0.040 | 2 | vrsi <sup>73</sup> PTLIFFK <sup>79</sup> ngev            |
| 38.1     | -2.1   | 4.53   | 1443.745 | -0.069 | 2 | iffk <sup>80</sup> NGEVVDQLVGAQSK <sup>93</sup> qais     |

Mascot-RM2228 hplc#70 gs1

Score: 48 Queries matched: 2

Chaperonin, 10 kDa [*Campylobacter coli* RM2228]

1 MNFQPLGKRVLVKRVEETKTTASGIIPDNAK**EKPLMGEVAVSK**EITDI  
 51 ANGDKIVFAKYGGTEIKIDNSEYLVNLDDILGILK

| Observed | Mr(expt) | Mr(calc) | Delta | Miss | Score | Expect | Rank | Peptide                          |
|----------|----------|----------|-------|------|-------|--------|------|----------------------------------|
| 307.71   | 613.41   | 613.43   | -0.01 | 1    | 24    | 25     | 1    | R.VLVKR.V                        |
| 468.25   | 1401.73  | 1401.75  | -0.03 | 0    | 26    | 23     | 1    | K.EKPLMGEVAVSK.E + Oxidation (M) |

### GPM-RM2228 hplc#70 gs1

log(e) = -1.7

RM\_2228\_groES\_[10\_kD\_chaperonin\_(cpn10)\_]

1 MNFQPLGKRVLVKRVVEETKTTASGIIIPDNAK**EKPLMGEVVAVSK**EITDIANGDKIVFAK 60  
 61 YGGTEIKIDNSEYLVNLDDILGILK 86

| spectrum | log(e) | log(I) | m+h      | delta  | z | sequence                                                   |
|----------|--------|--------|----------|--------|---|------------------------------------------------------------|
| 19.1     | -1.7   | 1.96   | 1402.767 | -0.045 | 3 | dnak <sup>33</sup> <b>EKPLMGEVVAVSK</b> <sup>45</sup> eidt |

### Mascot-RM2228 hplc#70 gs2

Score: 1399 Queries matched: 35

Ribosomal protein L7/L12 [Campylobacter coli RM2228]

1 **MAISKEDVLEFISNLSVLELSELVKEFEKFGVSAAPVMVAGGAAAGGAA**  
 51 **AAAEKTEFDIVLVDGGAKKIEVIKIVRALTGLGLKEAKDAVEQTPSTLK**  
 101 **EGVAKADAEAAKQLEEAGAKVELK**

| Observed | Mr(expt) | Mr(calc) | Delta | Miss | Score | Expect  | Rank | Peptide                  |
|----------|----------|----------|-------|------|-------|---------|------|--------------------------|
| 503.27   | 502.26   | 502.28   | -0.01 | 0    | 35    | 0.77    | 1    | K.EGVAK.A                |
| 301.18   | 600.35   | 600.38   | -0.04 | 0    | 30    | 11      | 1    | K.IEVIK.I                |
| 365.21   | 728.40   | 728.48   | -0.08 | 1    | (41)  | 0.94    | 1    | K.KIEVIK.I               |
| 729.44   | 728.43   | 728.48   | -0.05 | 1    | 46    | 0.28    | 1    | K.KIEVIK.I               |
| 367.16   | 732.31   | 732.33   | -0.02 | 0    | 33    | 5       | 1    | K.ADAEEAK.K              |
| 386.72   | 771.43   | 771.49   | -0.06 | 0    | 55    | 0.034   | 1    | R.ALTGLGLK.E             |
| 423.19   | 844.37   | 844.43   | -0.06 | 0    | 33    | 5.4     | 2    | K.QLEEAGAK.V             |
| 431.20   | 860.39   | 860.42   | -0.04 | 1    | 54    | 0.041   | 1    | K.ADAEEAKK.Q             |
| 487.25   | 972.48   | 972.52   | -0.04 | 1    | 66    | 0.0028  | 1    | K.KLEEAGAK.V             |
| 366.57   | 1096.70  | 1096.73  | -0.04 | 2    | 24    | 31      | 3    | K.KIEVIKIV.RA            |
| 550.80   | 1099.59  | 1099.66  | -0.07 | 1    | 64    | 0.0035  | 1    | R.ALTGLGLKEAK.D          |
| 594.76   | 1187.50  | 1187.60  | -0.10 | 0    | 49    | 0.12    | 1    | K.DAVEQTPSTLK.E          |
| 657.84   | 1313.66  | 1313.72  | -0.06 | 1    | 67    | 0.0019  | 1    | K.QLEEAGAKVELK.-         |
| 438.91   | 1313.70  | 1313.72  | -0.02 | 1    | (27)  | 20      | 7    | K.QLEEAGAKVELK.-         |
| 673.33   | 1344.64  | 1344.69  | -0.05 | 2    | 61    | 0.0073  | 1    | K.EGVAKADAEAAKQ          |
| 682.31   | 1362.60  | 1362.70  | -0.10 | 0    | (65)  | 0.0024  | 1    | K.TEFDIVLVDGGAK.K        |
| 1363.66  | 1362.65  | 1362.70  | -0.05 | 0    | 73    | 0.00047 | 1    | K.TEFDIVLVDGGAK.K        |
| 481.59   | 1441.74  | 1441.81  | -0.08 | 2    | 58    | 0.013   | 1    | K.KQLEEAGAKVELK.-        |
| 497.92   | 1490.75  | 1490.80  | -0.05 | 1    | 56    | 0.02    | 1    | K.TEFDIVLVDGGAK.I        |
| 758.86   | 1515.71  | 1515.78  | -0.06 | 1    | 68    | 0.0014  | 1    | K.EAKDAVEQTPSTLK.E       |
| 558.26   | 1671.77  | 1671.87  | -0.09 | 1    | 55    | 0.026   | 1    | K.DAVEQTPSTLKEGVAK.A     |
| 558.29   | 1671.84  | 1671.87  | -0.03 | 1    | (26)  | 24      | 3    | K.DAVEQTPSTLKEGVAK.A     |
| 563.25   | 1686.72  | 1686.84  | -0.12 | 2    | 53    | 0.041   | 1    | K.ADAEEAKKQLEEAGAK.V     |
| 563.27   | 1686.78  | 1686.84  | -0.06 | 2    | (37)  | 1.6     | 1    | K.ADAEEAKKQLEEAGAK.V     |
| 617.72   | 1850.13  | 1850.21  | -0.08 | 3    | 55    | 0.023   | 1    | K.KIEVIKIVRALTGLGLK.E    |
| 667.66   | 1999.95  | 2000.04  | -0.09 | 2    | 53    | 0.047   | 1    | K.EAKDAVEQTPSTLKEGVAK.A  |
| 540.02   | 2156.04  | 2156.13  | -0.10 | 3    | 32    | 5.8     | 1    | K.ADAEEAKKQLEEAGAKVELK.- |

|         |         |         |       |   |      |          |   |                                                            |
|---------|---------|---------|-------|---|------|----------|---|------------------------------------------------------------|
| 545.58  | 2178.30 | 2178.38 | -0.08 | 4 | 18   | 1.2e+002 | 6 | K.KIEVIKIVRALTGLGLKEAK.D                                   |
| 749.68  | 2246.03 | 2246.10 | -0.07 | 0 | 37   | 1.8      | 1 | K.FGVSAAPVMVAGGAAAGGAAAAAEEK.T + Oxidation (M)             |
| 759.39  | 2275.16 | 2275.22 | -0.06 | 0 | 35   | 2.7      | 1 | K.EDVLEFISNLSVLELSELVK.E                                   |
| 892.47  | 2674.38 | 2674.47 | -0.09 | 1 | 68   | 0.0016   | 1 | M.AISKEDVLEFISNLSVLELSELVK.E                               |
| 799.71  | 3194.83 | 3194.90 | -0.07 | 4 | 26   | 21       | 1 | K.TEFDIVLDGGAKKIEVIKIVRALTGLGLK.E                          |
| 835.16  | 3336.59 | 3336.76 | -0.17 | 2 | 71   | 0.00078  | 1 | M.AISKEDVLEFISNLSVLELSELVKEFEK.F                           |
| 1113.56 | 3337.67 | 3336.76 | 0.91  | 2 | (62) | 0.0058   | 1 | M.AISKEDVLEFISNLSVLELSELVKEFEK.F                           |
| 898.92  | 3591.66 | 3590.79 | 0.87  | 1 | 25   | 29       | 1 | K.FGVSAAPVMVAGGAAAGGAAAAAEEKTEFDIVLDGGAK.K + Oxidation (M) |

### GPM-RM2228 hplc#70 gs2

log(e) = -104.0 RM\_2228\_rplL\_[50S\_ribosomal\_protein\_L7/L12\_]
   
1 MAISKEDVLEFISNLSVLELSELVKEFEKFGVSAAPVMVAGGAAAGGAAAAAEEKTEFD 60
   
61 IVLVDGGAKKIEVIKIVRALTGLGLKEAKDAVEQTPSTLKEGVAKADAEAAKQLEEAGA 120
   
121 KVELK 125

| spectrum | log(e) | log(I) | m+h      | delta  | z | sequence                                                         |
|----------|--------|--------|----------|--------|---|------------------------------------------------------------------|
| 60.1     | -1.3   | 3.71   | 3337.767 | -0.146 | 4 | [m <sup>2</sup> AISKEDVLEFISNLSVLELSELVKEFEK <sup>30</sup> fgvs  |
| 57.1     | -3.4   | 3.45   | 2675.476 | -0.097 | 3 | [m <sup>2</sup> AISKEDVLEFISNLSVLELSELVK <sup>25</sup> efee      |
| 38.1     | -3.6   | 2.67   | 2247.114 | -0.076 | 3 | feek <sup>31</sup> FGVSAAPVMVAGGAAAGGAAAAAEEK <sup>56</sup> tefd |
| 33.1     | -4.2   | 2.96   | 1491.807 | -0.061 | 3 | aEEK <sup>57</sup> TEFDIVLDGGAKK <sup>70</sup> ievi              |
| 35.1     | -4.4   | 4.33   | 1363.712 | -0.096 | 2 | aEEK <sup>57</sup> TEFDIVLDGGAKK <sup>69</sup> kiev              |
| 83.1     | -3.2   | 2.75   | 1363.712 | 0.281  | 2 | aEEK <sup>57</sup> TEFDIVLDGGAKK <sup>69</sup> kiev              |
| 46.1     | -1.2   | 2.53   | 1851.217 | -0.072 | 3 | ggak <sup>70</sup> KIEVIKIVRALTGLGLK <sup>86</sup> eakd          |
| 26.1     | -2.3   | 3.35   | 1100.668 | -0.063 | 2 | kiVR <sup>79</sup> ALTGLGLKEAK <sup>89</sup> dave                |
| 20.1     | -2.9   | 3.45   | 2001.051 | -0.094 | 3 | lgIk <sup>87</sup> EAKDAVEQTPSTLKEGVAK <sup>105</sup> adae       |
| 14.1     | -5.9   | 3.58   | 1516.786 | -0.066 | 2 | lgIk <sup>87</sup> EAKDAVEQTPSTLK <sup>100</sup> egva            |
| 16.1     | -3.0   | 4.10   | 1672.876 | -0.106 | 3 | keak <sup>90</sup> DAVEQTPSTLKEGVAK <sup>105</sup> adae          |
| 13.1     | -1.6   | 4.40   | 1188.612 | -0.111 | 2 | keak <sup>90</sup> DAVEQTPSTLK <sup>100</sup> egva               |
| 12.1     | -1.9   | 3.04   | 1345.697 | -0.054 | 2 | stIk <sup>101</sup> EGVAKADAEAAK <sup>113</sup> qlee             |
| 18.1     | -4.1   | 4.01   | 1687.851 | -0.113 | 3 | gvak <sup>106</sup> ADAEAAKQLEEAGAK <sup>121</sup> velk]         |
| 39.1     | -1.2   | 2.37   | 1687.851 | -0.057 | 3 | gvak <sup>106</sup> ADAEAAKQLEEAGAK <sup>121</sup> velk]         |
| 7.1      | -1.9   | 3.95   | 861.432  | -0.031 | 2 | gvak <sup>106</sup> ADAEAAK <sup>113</sup> qlee                  |
| 27.1     | -3.0   | 4.00   | 1297.712 | -0.090 | 2 | eakk <sup>114</sup> QLEEAGAKVELK <sup>125</sup> ]                |
| 23.1     | -2.6   | 3.85   | 1314.728 | -0.065 | 2 | eakk <sup>114</sup> QLEEAGAKVELK <sup>125</sup> ]                |
| 36.1     | -1.7   | 2.85   | 1297.712 | -0.046 | 2 | eakk <sup>114</sup> QLEEAGAKVELK <sup>125</sup> ]                |
| 24.1     | -1.3   | 3.55   | 1297.712 | -1.049 | 3 | eakk <sup>114</sup> QLEEAGAKVELK <sup>125</sup> ]                |
| 8.1      | -2.6   | 4.21   | 828.421  | -1.025 | 2 | eakk <sup>114</sup> QLEEAGAK <sup>121</sup> velk]                |



## RM1051 Protein Biomarkers

Mascot-RM1051 hplc#40 gs2

Score: 305 Queries matched: 6

Protein of unknown function (DUF465) family [*Campylobacter coli* RM2228]

1 MLHEYRELMSELK GKDAHFDKLFER **HNELDDQIKDAEEGRNLLSDIEISN**

51 **LKKEKLHIKDQLNQYLANYKK**

| Observed Mr(expt) | Mr(calc) | DeltaMissScore | Expect | Rank | Peptide                         |
|-------------------|----------|----------------|--------|------|---------------------------------|
| 556.29            | 1110.57  | 1110.53        | 0.04   | 0    | 60 0.0081 1 R.HNELDDQIK.D       |
| 679.91            | 1357.80  | 1357.75        | 0.05   | 0    | 46 0.24 1 R.NLLSDIEISNLK.K      |
| 685.36            | 1368.70  | 1368.67        | 0.03   | 0    | 42 0.59 1 K.DQLNQYLANYK.K       |
| 496.31            | 1485.90  | 1485.84        | 0.06   | 1    | 61 0.0077 1 R.NLLSDIEISNLK.K.E  |
| 590.29            | 1767.86  | 1767.80        | 0.06   | 1    | 65 0.0026 1 R.HNELDDQIKDAEEGR.N |
| 621.02            | 1860.03  | 1859.99        | 0.05   | 1    | 32 6 1 K.LHIKDQLNQYLANYK.K      |

GPM-RM1051 hplc#40 gs2

log(e) = -31.0 RM2228 Cc0466 [Conserved hypothetical protein, similar to *C. jejuni* CJ0449]

1 MLHEYRELMSELK GKDAHFDKLFER **HNELDDQIKDAEEGRNLLSDIEISNLKKEKLHIKD** 60  
61 **QLNQYLANYKK** 71

| spectrum | log(e) | log(I) | m+h      | delta | z | sequence                                                     |
|----------|--------|--------|----------|-------|---|--------------------------------------------------------------|
| 25.1     | -8.1   | 2.42   | 1768.811 | 0.064 | 3 | lfer <sup>26</sup> <b>HNELDDQIKDAEEGR</b> <sup>40</sup> nlls |
| 22.1     | -3.1   | 2.57   | 1111.539 | 0.044 | 2 | lfer <sup>26</sup> <b>HNELDDQIK</b> <sup>34</sup> daee       |
| 37.1     | -1.2   | 2.29   | 1486.849 | 0.046 | 3 | eegr <sup>41</sup> <b>NLLSDIEISNLK</b> <sup>53</sup> eklh    |
| 42.1     | -1.3   | 2.57   | 1358.754 | 0.055 | 2 | eegr <sup>41</sup> <b>NLLSDIEISNLK</b> <sup>52</sup> kekl    |
| 38.1     | -1.7   | 2.23   | 1259.722 | 0.040 | 2 | grn <sup>43</sup> <b>LSDIEISNLK</b> <sup>53</sup> eklh       |

Mascot-RM1051 hplc#40 gs2 060207

Score: 75 Queries matched: 3

Ribosomal protein S16 [*Campylobacter coli* RM2228]

1 **MTVIRLTRMGRTKRPFYRIVVTD**SRKRRDGGWIESIGYYNPMVEPEVVKF

51 **DSERLAYWKSVGAKLSDKVASIT**SK

| ObservedMr(expt) | Mr(calc) | DeltaMissScore | Expect | Rank | Peptide                                 |
|------------------|----------|----------------|--------|------|-----------------------------------------|
| 318.19           | 634.37   | 634.35         | 0.02   | 0    | 16 2.5e+002 2 -.MTVIR.L + Oxidation (M) |

353.22 704.44 704.41 0.03 0 34 3.4 1 K.VASITSK.-  
 395.74 789.46 788.44 1.02 0 25 29 2 R.IVVTDSR.K

GPM-RM1051 hplc#40 gs3

log(e) = -60.5

RM2228 rpsS [30S ribosomal protein S19]

1 MARSLK**KGPFVDDHVMKK**VIAAK**KANDNKPIK**TWSR**RSTIIPDMIGLTFNVHNGK**SFIPV 60  
 61 **YITENHIGYKLGEFAPTR**TFKGHKGSVQKKIGK 93

| spectrum | log(e) | log(I) | m+h      | delta  | z | sequence                                                                          |
|----------|--------|--------|----------|--------|---|-----------------------------------------------------------------------------------|
| 24.1     | -1.3   | 3.77   | 1416.737 | 0.041  | 3 | rslk <sup>7</sup> <b>KGPFVDDHVM</b> <b>KK</b> <sup>18</sup> viaa                  |
| 15.1     | -1.9   | 2.77   | 1027.591 | 0.038  | 2 | iaak <sup>24</sup> <b>KANDNKPIK</b> <sup>32</sup> twsr                            |
| 17.1     | -1.4   | 3.79   | 1027.591 | -0.002 | 3 | iaak <sup>24</sup> <b>KANDNKPIK</b> <sup>32</sup> twsr                            |
| 13.1     | -4.8   | 3.36   | 899.496  | 0.009  | 2 | aakk <sup>25</sup> <b>ANDNKPIK</b> <sup>32</sup> twsr                             |
| 36.1     | -6.9   | 3.25   | 2129.124 | 0.072  | 3 | twsr <sup>37</sup> <b>RSTIIPDM</b> <b>I</b> <b>IGLTFNVHNGK</b> <sup>55</sup> sfip |
| 37.1     | -3.4   | 3.64   | 1973.022 | 0.062  | 3 | wrrr <sup>38</sup> <b>STIIPDM</b> <b>I</b> <b>IGLTFNVHNGK</b> <sup>55</sup> sfip  |
| 35.1     | -5.8   | 2.69   | 1558.774 | 0.055  | 3 | stii <sup>42</sup> <b>PDM</b> <b>I</b> <b>IGLTFNVHNGK</b> <sup>55</sup> sfip      |
| 38.1     | -6.9   | 3.41   | 1433.743 | 0.047  | 2 | ksfi <sup>59</sup> <b>PVYITENHIGYK</b> <sup>70</sup> lgef                         |
| 29.1     | -2.6   | 4.04   | 890.474  | 0.011  | 2 | igyk <sup>71</sup> <b>LGEFAPTR</b> <sup>78</sup> tfkg                             |
| 49.1     | -1.4   | 2.30   | 890.474  | 0.034  | 2 | igyk <sup>71</sup> <b>LGEFAPTR</b> <sup>78</sup> tfkg                             |

Mascot-RM1051 hplc#40 gs3

Score: 492 Queries matched: 13

Ribosomal protein S19 [Campylobacter coli RM2228]

1 MARSLK**KGPFVDDHVMKK**VIAAK**KANDNKPIK**TWSR**RSTIIPDMIGLTFN**  
 51 **VHNGKSFI****PVYITENHIGYKLGEFAPTR**TFKGHK**GSVQKKIGK**

| Observed | Mr(expt) | Mr(calc) | Delta | Miss | Score | Expect   | Rank | Peptide                          |
|----------|----------|----------|-------|------|-------|----------|------|----------------------------------|
| 251.18   | 500.34   | 500.33   | 0.01  | 0    | 35    | 0.51     | 1    | K.VIAAK.K                        |
| 315.23   | 628.45   | 628.43   | 0.02  | 1    | 44    | 0.38     | 1    | K.KVIAAK.K                       |
| 323.71   | 645.40   | 645.38   | 0.02  | 1    | 19    | 1.6e+002 | 1    | K.GSVQKK.I                       |
| 445.75   | 889.48   | 889.47   | 0.01  | 0    | (45)  | 0.27     | 1    | K.LGEFAPTR.T                     |
| 445.76   | 889.50   | 889.47   | 0.03  | 0    | 68    | 0.0016   | 1    | K.LGEFAPTR.T                     |
| 450.26   | 898.50   | 898.49   | 0.01  | 0    | 58    | 0.013    | 1    | K.ANDNKPIK.T                     |
| 343.20   | 1026.58  | 1026.58  | 0.00  | 1    | (27)  | 18       | 1    | K.KANDNKPIK.T                    |
| 514.31   | 1026.61  | 1026.58  | 0.03  | 1    | 48    | 0.12     | 1    | K.KANDNKPIK.T                    |
| 644.85   | 1287.68  | 1287.63  | 0.06  | 1    | 21    | 70       | 1    | K.GPFVDDHVMKK.V + Oxidation (M)  |
| 472.93   | 1415.78  | 1415.72  | 0.06  | 2    | 21    | 65       | 1    | K.KGPFVDDHVMKK.V + Oxidation (M) |
| 594.34   | 1780.00  | 1779.92  | 0.08  | 0    | 38    | 1.5      | 1    | K.SFIPVYITENHIGYK.L              |

658.37 1972.08 1972.01 0.07 0 65 0.0026 1 R.STIIPDMIGLTFNVHNGK.S + Oxidation (M)  
 710.40 2128.19 2128.11 0.08 1 79 0.00011 1 R.RSTIIPDMIGLTFNVHNGK.S + Oxidation (M)

Mascot-RM1051 hplc#44 gs1 060207

Score: 250 Queries matched: 8

phnA protein [*Campylobacter coli* RM2228]

1 MPK DANGTELNAGDSVSM I KDLK VKGASTTLKRGTTIKNIKLTSKENEIE  
 51 AKVDFKFGVIVLKTEFLK KI

| Observed | Mr(expt) | Mr(calc) | Delta | Miss | Score | Expect   | Rank | Peptide         |
|----------|----------|----------|-------|------|-------|----------|------|-----------------|
| 519.32   | 518.31   | 518.31   | 0.01  | 0    | 12    | 1.8e+002 | 1    | R.GTTIK.N       |
| 319.18   | 636.34   | 636.35   | -0.01 | 0    | 27    | 13       | 2    | K.TEFLK.K       |
| 338.67   | 675.32   | 676.38   | -1.06 | 0    | 30    | 9.1      | 1    | K.GASTTLK.R     |
| 388.24   | 774.47   | 774.50   | -0.03 | 0    | 45    | 0.33     | 1    | K.FGVIVLK.T     |
| 416.70   | 831.39   | 831.40   | -0.01 | 0    | 30    | 11       | 1    | K.ENEIEAK.V     |
| 452.78   | 903.54   | 903.54   | -0.00 | 1    | 36    | 2.3      | 1    | K.VKGASTTLK.R   |
| 373.23   | 1116.67  | 1116.69  | -0.02 | 1    | 38    | 1.4      | 1    | K.VDKFGVIVLK.T  |
| 421.23   | 1260.66  | 1260.66  | 0.01  | 1    | 39    | 1.2      | 1    | K.LTSKENEIEAK.V |

GPM-RM1051 hplc#44 gs1 060207

log(e) = -11.1

RM\_2228\_Cc1532\_[Conserved\_hypothetical\_protein,\_PhnA-  
 like\_protein,\_similar\_to\_C.\_jejuni\_CJ0185]

1 MPK DANGTELNAGDSVSM I KDLK VVKGASTTLKRGTTIKNIKLTSKENEIE 50  
 51 AKVDFKFGVIVLKTEFLK KI 69

| spectrum | log(e) | log(I) | m+h      | delta  | z | sequence                                          |
|----------|--------|--------|----------|--------|---|---------------------------------------------------|
| 41.1     | -2.2   | 3.30   | 1117.699 | -0.013 | 3 | ieak <sup>53</sup> VDFKFGVIVLK <sup>62</sup> tefl |
| 44.1     | -1.9   | 4.03   | 775.509  | -0.032 | 2 | kvdk <sup>56</sup> FGVIVLK <sup>62</sup> tefl     |
| 47.1     | -1.2   | 2.77   | 775.509  | -0.006 | 2 | kvdk <sup>56</sup> FGVIVLK <sup>62</sup> tefl     |
| 29.1     | -1.3   | 3.89   | 637.357  | -0.017 | 2 | ivlk <sup>63</sup> TEFLK <sup>67</sup> ki]        |

"Composite" Sequence Analysis by GPM of RM1051 hplc#44 gs1 060207

\*\*\*\*\*

log(e) = -18.2

Composite\_RM1051\_Cc1532\_[RM2228\_CjjHB93\_13\_Conserved\_hypothetical\_protein,  
 \_PhnA-like\_protein,\_similar\_to\_C.\_jejuni\_CJ0185]

1 MPK**DANGTELNAGDSVSVIK**DLKVKGASTTLKRGTTIKNIKLTSKENEIE 50  
 51 AK**VDKFGVIVLKTEFLK**KI 69

| spectrum | log(e) | log(I) | m+h      | delta  | z | sequence                                                      |
|----------|--------|--------|----------|--------|---|---------------------------------------------------------------|
| 33.1     | -2.9   | 3.14   | 1689.830 | -0.012 | 2 | [mpk <sup>4</sup> <b>DANGTELNAGDSVSVIK</b> <sup>20</sup> dlkv |
| 41.1     | -2.2   | 3.30   | 1117.699 | -0.013 | 3 | ieak <sup>53</sup> <b>VDKFGVIVLK</b> <sup>62</sup> tefl       |
| 44.1     | -1.9   | 4.03   | 775.509  | -0.032 | 2 | kvdk <sup>56</sup> <b>FGVIVLK</b> <sup>62</sup> tefl          |
| 47.1     | -1.2   | 2.77   | 775.509  | -0.006 | 2 | kvdk <sup>56</sup> <b>FGVIVLK</b> <sup>62</sup> tefl          |
| 29.1     | -1.3   | 3.89   | 637.357  | -0.017 | 2 | ivlk <sup>63</sup> <b>TEFLK</b> <sup>67</sup> ki]             |

\*\*\*\*\*

Mascot-RM1051 hplc#44 gs1 060207

Score: 242 Queries matched: 7

Conserved Domain Protein [*Campylobacter jejuni* subsp. *jejuni* HB93-13]

1 MA**K**DANGTELNAGDSV**S**VI**K**DLK**V**KGASTTLK**R**GTT**I**KNIKLTSKE**G**EIE  
 51 AR**V**DKFGVIVLK**T**EFL**K**KI

| Observed | Mr(expt) | Mr(calc) | Delta | Miss | Score | Expect   | Rank | Peptide               |
|----------|----------|----------|-------|------|-------|----------|------|-----------------------|
| 519.32   | 518.31   | 518.31   | 0.01  | 0    | 12    | 1.8e+002 | 1    | R.GTTIK.N             |
| 319.18   | 636.34   | 636.35   | -0.01 | 0    | 27    | 13       | 2    | K.TEFLK.K             |
| 338.67   | 675.32   | 676.38   | -1.06 | 0    | 30    | 9.1      | 1    | K.GASTTLK.R           |
| 388.24   | 774.47   | 774.50   | -0.03 | 0    | 45    | 0.33     | 1    | K.FGVIVLK.T           |
| 452.78   | 903.54   | 903.54   | -0.00 | 1    | 36    | 2.3      | 1    | K.VKGASTTLK.R         |
| 373.23   | 1116.67  | 1116.69  | -0.02 | 1    | 38    | 1.4      | 1    | R.VDKFGVIVLK.T        |
| 845.41   | 1688.80  | 1688.82  | -0.02 | 0    | 58    | 0.013    | 1    | K.DANGTELNAGDSVSVIK.D |

Mascot-RM1051\_hplc#46\_gs2\_060207

Score: 632 Queries matched: 17

Ribosomal protein S15 [*Campylobacter coli* RM2228]

1 MALDSAKKAEIVAK**F**AR**K**AGDTG**S**TEVQ**V**ALL**S**AR**I**TELTEHLKI**Y**K**D**FD  
 51 **S**SRLGLLKL**V**GQR**K**RL**L**AYL**K**R**K**D**Y**NS**S**KL**I**TEL**N**LR**D**K

| Observed Mr(expt) | Mr(calc) | Delta   | Miss | Score | Expect | Rank     | Peptide                  |
|-------------------|----------|---------|------|-------|--------|----------|--------------------------|
| 272.21            | 542.40   | 542.38  | 0.02 | 0     | 31     | 3        | 1 R.LGLLK.L              |
| 302.69            | 603.36   | 603.32  | 0.03 | 0     | 37     | 2        | 1 M.ALDSAK.K             |
| 315.71            | 629.41   | 629.37  | 0.04 | 0     | 33     | 6.2      | 1 K.AEIVAK.F             |
| 360.75            | 719.49   | 719.46  | 0.03 | 0     | 44     | 0.4      | 1 R.LLAYLK.R             |
| 360.76            | 719.51   | 719.46  | 0.05 | 0     | (29)   | 10       | 1 R.LLAYLK.R             |
| 370.21            | 738.41   | 738.37  | 0.04 | 1     | 27     | 9.8      | 1 K.KDFSSR.L             |
| 379.75            | 757.49   | 757.47  | 0.02 | 1     | 48     | 0.16     | 1 K.KAEIVAK.F            |
| 379.77            | 757.52   | 757.47  | 0.05 | 1     | (24)   | 43       | 1 K.KAEIVAK.F            |
| 438.71            | 875.41   | 875.37  | 0.05 | 0     | 41     | 0.68     | 1 K.DYNSYSK.L            |
| 486.31            | 970.60   | 970.58  | 0.02 | 0     | 61     | 0.007    | 1 K.LITELNLR.D           |
| 502.76            | 1003.51  | 1003.46 | 0.05 | 1     | 50     | 0.093    | 1 R.KDYNSYSK.L           |
| 548.89            | 1095.77  | 1095.71 | 0.06 | 1     | 58     | 0.0093   | 1 R.LGLLKLVGQR.K         |
| 387.55            | 1159.62  | 1159.56 | 0.06 | 2     | 21     | 69       | 1 K.RKDYNSYSK.L          |
| 448.63            | 1342.87  | 1342.78 | 0.08 | 2     | 46     | 0.22     | 1 M.ALDSAKKAEIVAK.F      |
| 837.98            | 1673.95  | 1673.86 | 0.09 | 0     | 92     | 5.6e-006 | 1 K.AGDTGSTEVQVALLSAR.I  |
| 601.68            | 1802.03  | 1801.95 | 0.08 | 1     | 52     | 0.059    | 1 R.KAGDTGSTEVQVALLSAR.I |
| 601.69            | 1802.06  | 1801.95 | 0.11 | 1     | (48)   | 0.13     | 1 R.KAGDTGSTEVQVALLSAR.I |

GPM-RM1051\_hplc#46\_gs2\_060207

log(e) = -71.2

RM2228 rpsO [30S ribosomal protein S15]

1 MALDSAKKAEIVAKFARKAGDTGSTEVQVALLSARITELTEHLKIYKKDF 50  
 51 SSR LGLLKLVGQRKRL LAYLK R KDYNSYSK LI TELNLRDK 90

| spectrum | log(e) | log(I) | m+h      | delta | z | sequence                                                 |
|----------|--------|--------|----------|-------|---|----------------------------------------------------------|
| 26.1     | -6.5   | 3.12   | 1343.790 | 0.070 | 3 | [m <sup>2</sup> ALDSAKKAEIVAK <sup>14</sup> fark         |
| 5.1      | -4.0   | 2.77   | 604.331  | 0.029 | 2 | [m <sup>2</sup> ALDSAK <sup>7</sup> kaei                 |
| 28.1     | -2.4   | 2.82   | 1159.669 | 0.053 | 2 | [mal <sup>4</sup> DSAKKAEIVAK <sup>14</sup> fark         |
| 22.1     | -2.1   | 4.32   | 758.478  | 0.022 | 2 | dsak <sup>8</sup> KAEIVAK <sup>14</sup> fark             |
| 42.1     | -4.9   | 3.90   | 1802.962 | 0.057 | 3 | kfar <sup>18</sup> KAGDTGSTEVQVALLSAR <sup>35</sup> itel |
| 92.1     | -3.2   | 2.07   | 1802.962 | 0.108 | 3 | kfar <sup>18</sup> KAGDTGSTEVQVALLSAR <sup>35</sup> itel |
| 45.1     | -6.3   | 2.53   | 1674.867 | 0.089 | 2 | fark <sup>19</sup> AGDTGSTEVQVALLSAR <sup>35</sup> itel  |
| 47.1     | -3.7   | 2.74   | 1096.721 | 0.055 | 2 | fssr <sup>54</sup> LGLLKLVGQR <sup>63</sup> krll         |
| 19.1     | -1.7   | 3.03   | 1160.570 | 0.048 | 3 | aylk <sup>72</sup> RKDYNSYSK <sup>80</sup> lite          |
| 14.1     | -2.4   | 2.48   | 1004.469 | 0.053 | 2 | ylkr <sup>73</sup> KDYNSYSK <sup>80</sup> lite           |
| 50.1     | -1.3   | 2.45   | 745.421  | 0.046 | 1 | skli <sup>83</sup> TELNLR <sup>88</sup> dk]              |

\*\*\*\*\*

"Composite" Sequence Analysis by GPM of RM1051\_hplc#46\_gs2\_060207

\*\*\*\*\*

**log(e) = -87.5      "Composite" RM1051 rpsO [RM2228 & RM1221 30S ribosomal protein S15]**

1 MALDSAKKAEIVAKFARKAGDTGSTE<sup>V</sup>QVALLSARIAELTEHLK<sup>I</sup>YKKDF 50  
 51 SSR<sup>L</sup>GLLKLVGQRKRL<sup>L</sup>LAYLK<sup>R</sup>KDYNSYSK<sup>L</sup>I<sup>T</sup>ELNLRDK 90

| spectrum | log(e) | log(I) | m+h      | delta | z | sequence                                                              |
|----------|--------|--------|----------|-------|---|-----------------------------------------------------------------------|
| 26.1     | -6.6   | 3.12   | 1343.790 | 0.070 | 3 | [m <sup>2</sup> ALDSAKKAEIVAK <sup>14</sup> fark                      |
| 5.1      | -4.0   | 2.77   | 604.331  | 0.029 | 2 | [m <sup>2</sup> ALDSAK <sup>7</sup> kaei                              |
| 28.1     | -2.5   | 2.82   | 1159.669 | 0.053 | 2 | [mal <sup>4</sup> DSAKKAEIVAK <sup>14</sup> fark                      |
| 22.1     | -2.1   | 4.32   | 758.478  | 0.022 | 2 | dsak <sup>8</sup> KAEIVAK <sup>14</sup> fark                          |
| 42.1     | -4.8   | 3.90   | 1802.962 | 0.057 | 3 | kfar <sup>18</sup> KAGDTGSTE <sup>V</sup> QVALLSAR <sup>35</sup> iael |
| 92.1     | -3.3   | 2.07   | 1802.962 | 0.108 | 3 | kfar <sup>18</sup> KAGDTGSTE <sup>V</sup> QVALLSAR <sup>35</sup> iael |
| 45.1     | -6.4   | 2.53   | 1674.867 | 0.089 | 2 | fark <sup>19</sup> AGDTGSTE <sup>V</sup> QVALLSAR <sup>35</sup> iael  |
| 34.1     | -2.0   | 3.53   | 1053.595 | 0.047 | 2 | lsar <sup>36</sup> IAELTEHLK <sup>44</sup> iykk                       |
| 33.1     | -4.6   | 2.89   | 940.511  | 0.053 | 2 | sari <sup>37</sup> AELTEHLK <sup>44</sup> iykk                        |
| 47.1     | -3.7   | 2.74   | 1096.721 | 0.055 | 2 | fssr <sup>54</sup> LGLLKL <sup>V</sup> GQR <sup>63</sup> krll         |
| 19.1     | -1.7   | 3.03   | 1160.570 | 0.048 | 3 | aylk <sup>72</sup> RKDYN <sup>S</sup> YSK <sup>80</sup> lite          |
| 14.1     | -2.3   | 2.48   | 1004.469 | 0.053 | 2 | ylkr <sup>73</sup> KDYN <sup>S</sup> YSK <sup>80</sup> lite           |
| 50.1     | -1.3   | 2.45   | 745.421  | 0.046 | 1 | skl <sup>83</sup> TEL <sup>N</sup> LR <sup>88</sup> dk]               |

\*\*\*\*\*

Mascot-RM1051\_hplc#46\_gs2\_060207

Score: 516    Queries matched: 13

Ribosomal protein S15 [*Campylobacter jejuni* RM1221]

1 MALDSAKKAEIVAKFAKK<sup>P</sup>GD<sup>T</sup>GSTE<sup>V</sup>QVALL<sup>T</sup>ARIA<sup>I</sup>ELTEHLK<sup>I</sup>YKKDF  
 51 SSR<sup>L</sup>GLLKLVGQRKRL<sup>L</sup>SYLK<sup>S</sup>RKDYN<sup>S</sup>YSK<sup>L</sup>LITELNLRDK

| Observed Mr(expt) | Mr(calc) | Delta   | Miss | Score | Expect | Rank   | Peptide       |
|-------------------|----------|---------|------|-------|--------|--------|---------------|
| 272.21            | 542.40   | 542.38  | 0.02 | 0     | 31     | 3      | R.LGLLK.L     |
| 302.69            | 603.36   | 603.32  | 0.03 | 0     | 37     | 2      | M.ALDSAK.K    |
| 315.71            | 629.41   | 629.37  | 0.04 | 0     | 33     | 6.2    | K.AEIVAK.F    |
| 370.21            | 738.41   | 738.37  | 0.04 | 1     | 27     | 9.8    | K.KDFSSR.L    |
| 379.75            | 757.49   | 757.47  | 0.02 | 1     | 48     | 0.16   | K.KAEIVAK.F   |
| 379.77            | 757.52   | 757.47  | 0.05 | 1     | (24)   | 43     | K.KAEIVAK.F   |
| 438.71            | 875.41   | 875.37  | 0.05 | 0     | 41     | 0.68   | K.DYNSYSK.L   |
| 486.31            | 970.60   | 970.58  | 0.02 | 0     | 61     | 0.007  | K.LITELNLR.D  |
| 502.76            | 1003.51  | 1003.46 | 0.05 | 1     | 50     | 0.093  | R.KDYNSYSK.L  |
| 527.32            | 1052.63  | 1052.59 | 0.04 | 0     | 61     | 0.0051 | R.IAELTEHLK.I |

548.89 1095.77 1095.71 0.06 1 58 0.0093 1 R.LGLLKLVGQR.K  
387.55 1159.62 1159.56 0.06 2 21 69 1 K.RKDYSYSK.L  
448.63 1342.87 1342.78 0.08 2 46 0.22 1 M.ALDSAKKAEIVAK.F

GPM-RM1051\_hplc#46\_gs2\_060207

log(e) = -66.6

RM1221 rpsO [30S ribosomal protein S15]

1 MALDSAKKAEIVAKFAKKPGDTGSTEVEQVALLTARIAELTEHLKIYKKDF 50  
51 SSR LGLLKLVGQRKRLLSYLKRKDYSYSKLI TELNLRDK 90

| spectrum | log(e) | log(I) | m+h      | delta | z | sequence                                         |
|----------|--------|--------|----------|-------|---|--------------------------------------------------|
| 26.1     | -6.5   | 3.12   | 1343.790 | 0.070 | 3 | [m <sup>2</sup> ALDSAKKAEIVAK <sup>14</sup> fakk |
| 5.1      | -4.0   | 2.77   | 604.331  | 0.029 | 2 | [m <sup>2</sup> ALDSAK <sup>7</sup> kaei         |
| 28.1     | -2.4   | 2.82   | 1159.669 | 0.053 | 2 | [mal <sup>4</sup> DSAKKAEIVAK <sup>14</sup> fakk |
| 22.1     | -2.1   | 4.32   | 758.478  | 0.022 | 2 | dsak <sup>8</sup> KAEIVAK <sup>14</sup> fakk     |
| 34.1     | -2.2   | 3.53   | 1053.595 | 0.047 | 2 | ltar <sup>36</sup> IAELTEHLK <sup>44</sup> iykk  |
| 33.1     | -4.4   | 2.89   | 940.511  | 0.053 | 2 | tari <sup>37</sup> AELTEHLK <sup>44</sup> iykk   |
| 47.1     | -3.7   | 2.74   | 1096.721 | 0.055 | 2 | fssr <sup>54</sup> LGLLKLVGQR <sup>63</sup> krll |
| 19.1     | -1.7   | 3.03   | 1160.570 | 0.048 | 3 | sylk <sup>72</sup> RKDYSYSK <sup>80</sup> lite   |
| 14.1     | -2.4   | 2.48   | 1004.469 | 0.053 | 2 | ylkr <sup>73</sup> KDYSYSK <sup>80</sup> lite    |
| 50.1     | -1.3   | 2.45   | 745.421  | 0.046 | 1 | skli <sup>83</sup> TELNLR <sup>88</sup> dk]      |

Mascot-RM1051\_hplc#50\_gs1\_060207

Mass: 7030 Score: 230 Queries matched: 7

Ribosomal protein L29 [*Campylobacter coli* RM2228]

1 MKYTEIKDKTAAELATMLKEKVVLLFTLKQKLKTMQLTNPKEISEVRKDI  
51 ARINTAINALK

| Observed | Mr(expt) | Mr(calc) | Delta | Miss | Score | Expect | Rank | Peptide                       |
|----------|----------|----------|-------|------|-------|--------|------|-------------------------------|
| 301.69   | 601.37   | 601.35   | 0.02  | 1    | 21    | 1e+002 | 4    | R.KDIAR.I                     |
| 417.29   | 832.57   | 832.54   | 0.03  | 0    | 36    | 2.7    | 1    | K.VLLFTLK.Q                   |
| 474.77   | 947.52   | 947.47   | 0.04  | 0    | 34    | 3.6    | 1    | K.TMQLTNPKE + Oxidation (M)   |
| 479.30   | 956.59   | 956.57   | 0.03  | 0    | 38    | 1.4    | 1    | R.INTAINALK.-                 |
| 481.34   | 960.67   | 960.64   | 0.04  | 1    | 49    | 0.12   | 1    | K.KVLLFTLK.Q                  |
| 391.22   | 1170.62  | 1170.60  | 0.03  | 2    | 26    | 21     | 4    | -.MKYTEIKDK.T + Oxidation (M) |
| 397.24   | 1188.71  | 1188.65  | 0.05  | 1    | 25    | 26     | 2    | K.LKTMQLTNPKE + Oxidation (M) |

GPM-RM1051 hplc#50 gs1 060207

log(e) = -5.5

RM2228 rpmC [50S ribosomal protein L29]

1 MKYTEIKDKTAAELATMLKEK**KVLLFTLK**QKLKTMQLTNPKEI SEVRKDIAR**INTAINAL** 60  
 61 **K** 61

| spectrum | log(e) | log(I) | m+h     | delta | z | Sequence                                              |
|----------|--------|--------|---------|-------|---|-------------------------------------------------------|
| 25.1     | -1.1   | 2.06   | 961.646 | 0.030 | 2 | lkek <sup>22</sup> <b>KVLLFTLK</b> <sup>29</sup> qklk |
| 18.1     | -1.5   | 2.71   | 957.574 | 0.030 | 2 | diar <sup>53</sup> <b>INTAINAL</b> <sup>61</sup> K    |

Mascot-RM1051\_hplc#53\_gs1\_060207

Score: 378 Queries matched: 10

nifU protein homolog Cj1639 [*Campylobacter coli* RM2228]

1 **MMPFSDEELINPVKASLDKSMPLERDGGGLEFLGIKNGVVYVHLIGACK**  
 51 **GCASSGTTLYGLER**QLKIDIHPEITIVNLNGGAEDFAKL

| Observed | Mr(expt) | Mr(calc) | Delta | Miss | Score | Expect   | Rank | Peptide                                          |
|----------|----------|----------|-------|------|-------|----------|------|--------------------------------------------------|
| 267.17   | 532.33   | 532.29   | 0.05  | 0    | 32    | 2.6      | 1    | <b>K.ASLDK.S</b>                                 |
| 319.19   | 636.37   | 636.32   | 0.05  | 0    | 29    | 7.5      | 1    | <b>K.YGLER.Q</b>                                 |
| 448.23   | 894.45   | 894.39   | 0.06  | 0    | 18    | 1.2e+002 | 6    | <b>K.SMPMLER.D + 2 Oxidation (M)</b>             |
| 491.27   | 980.53   | 980.46   | 0.07  | 0    | 34    | 2.6      | 1    | <b>K.GCASSGTTLY</b>                              |
| 553.34   | 1104.66  | 1104.58  | 0.08  | 0    | 80    | 9.4e-005 | 1    | <b>R.DGGGLEFLGIK.N</b>                           |
| 470.60   | 1408.77  | 1408.67  | 0.10  | 1    | 34    | 3.4      | 1    | <b>K.ASLDKSMPLER.D + 2 Oxidation (M)</b>         |
| 477.29   | 1428.86  | 1428.75  | 0.11  | 0    | 39    | 1        | 1    | <b>K.NGVVYVHLIGACK.G</b>                         |
| 841.46   | 1680.90  | 1680.77  | 0.12  | 0    | 45    | 0.25     | 1    | <b>-.MMPFSDEELINPVK.A + 2 Oxidation (M)</b>      |
| 732.74   | 2195.21  | 2195.05  | 0.16  | 1    | 31    | 7.1      | 1    | <b>-.MMPFSDEELINPVKASLDK.S + 2 Oxidation (M)</b> |
| 629.88   | 2515.48  | 2515.33  | 0.16  | 1    | 36    | 2.1      | 1    | <b>R.DGGGLEFLGIKNGVVYVHLIGACK.G</b>              |

GPM-RM1051\_hplc#53\_gs1\_060207

log(e) = -32.7

RM2228 Cc0124 [Cons. hypo. protein, similar to *C. jejuni* CJ1639]

1 **MMPFSDEELINPVKASLDKSMPLERDGGGLEFLGIKNGVVYVHLIGACK** 50  
 51 **GCASSGTTLY**GLERQLKIDIHPEITIVNLNGGAEDFAKL 90



| spectrum | log(e) | log(I) | m+h      | delta | z | sequence                                                          |
|----------|--------|--------|----------|-------|---|-------------------------------------------------------------------|
| 27.1     | -1.6   | 2.71   | 1681.792 | 0.110 | 2 | [ <sup>1</sup> MMPFSDEELINPVK <sup>14</sup> asld                  |
| 15.1     | -1.3   | 2.50   | 1409.688 | 0.078 | 3 | npvk <sup>15</sup> ASLDKSM <sup>26</sup> PMLER <sup>26</sup> dggg |
| 10.1     | -1.0   | 2.63   | 895.412  | 0.052 | 2 | sldk <sup>20</sup> SMP <sup>26</sup> PMLER <sup>26</sup> dggg     |
| 34.1     | -6.5   | 2.59   | 1105.590 | 0.071 | 2 | m <sup>27</sup> ler <sup>27</sup> DGGGLEFLGIK <sup>37</sup> ngvv  |
| 25.1     | -1.4   | 2.06   | 1429.752 | 0.099 | 3 | lgik <sup>38</sup> NGVVYVHLIGACK <sup>50</sup> gcas               |
| 8.1      | -1.3   | 2.17   | 981.457  | 0.073 | 2 | gack <sup>51</sup> G <sup>60</sup> CASSGTTLK <sup>60</sup> ygle   |

Mascot-RM1051\_hplc#56\_gs1\_060210

Score: 42 Queries matched: 1

conserved hypothetical protein [*Campylobacter coli* RM2228]

1 MDKTK**VVENLNALFK**QRAEFYSYFDKNISKVGNTEVFDFSNKDLNAEEV  
 51 YKQFYHLDYAMRKLLPAIYKAYEVSDSDLNRDF

| Observed Mr(expt) | Mr(calc) | Delta   | MissScore | ExpectRank | Peptide          |
|-------------------|----------|---------|-----------|------------|------------------|
| 573.81            | 1145.61  | 1145.64 | -0.03     | 0 42 0.54  | 1 K.VVENLNALFK.Q |

Mascot-RM1051\_hplc#69\_gs1\_060210.wiff

Score: 575 Queries matched: 16

Thioredoxin [*Campylobacter jejuni* RM2228]

1 MGKYIELTSDN**FAQAK**EGVALVDFWAPWCGPCR**MLAPVIDELANDFDGKA**  
 51 **KICKVNTDEQGD**LAAEFGVRSIPTLIFFKNGEVVDQLVGAQSKQAISDKL  
 101 **NSSL**

| Observed | Mr(expt) | Mr(calc) | Delta | Miss Score | Expect | Rank     | Peptide              |
|----------|----------|----------|-------|------------|--------|----------|----------------------|
| 559.31   | 558.30   | 558.34   | -0.04 | 0          | 11     | 6.2e+002 | 9 K.LNSLL.-          |
| 310.17   | 618.32   | 618.35   | -0.03 | 1          | 20     | 90       | 9 K.AKICK.V          |
| 331.16   | 660.30   | 660.34   | -0.04 | 0          | 43     | 0.59     | 1 K.QAISDK.L         |
| 533.30   | 1064.58  | 1064.63  | -0.05 | 0          | (32)   | 5.2      | 1 R.SIPTLIFFK.N      |
| 533.40   | 1064.79  | 1064.63  | 0.16  | 0          | 51     | 0.044    | 1 R.SIPTLIFFK.N      |
| 601.81   | 1201.61  | 1200.67  | 0.94  | 1          | 18     | 1.3e+002 | 5 K.QAISDKLNSLL.-    |
| 722.34   | 1442.67  | 1442.74  | -0.07 | 0          | (59)   | 0.011    | 1 K.NGEVVDQLVGAQSK.Q |

|        |         |         |       |   |      |          |   |                                        |
|--------|---------|---------|-------|---|------|----------|---|----------------------------------------|
| 722.35 | 1442.69 | 1442.74 | -0.05 | 0 | 64   | 0.0033   | 1 | K.NGEVVDQLVGAQSK.Q                     |
| 750.34 | 1498.67 | 1498.73 | -0.06 | 0 | 78   | 0.00013  | 1 | K.YIELTSDNFAQAK.E                      |
| 750.50 | 1498.99 | 1498.73 | 0.26  | 0 | (45) | 0.22     | 1 | K.YIELTSDNFAQAK.E                      |
| 562.25 | 1683.74 | 1683.85 | -0.11 | 1 | 69   | 0.001    | 1 | M.GKYIELTSDNFAQAK.E                    |
| 860.87 | 1719.72 | 1719.81 | -0.08 | 0 | 80   | 8.1e-005 | 1 | K.VNTDEQGDAAEFGVR.S                    |
| 582.91 | 1745.72 | 1746.85 | -1.13 | 0 | (41) | 0.62     | 1 | R.MLAPVIDELANDFDGK.A                   |
| 882.37 | 1762.73 | 1762.84 | -0.11 | 0 | 70   | 0.00075  | 1 | R.MLAPVIDELANDFDGK.A + Oxidation (M)   |
| 588.70 | 1763.08 | 1762.84 | 0.23  | 0 | (47) | 0.15     | 1 | R.MLAPVIDELANDFDGK.A + Oxidation (M)   |
| 654.96 | 1961.85 | 1961.98 | -0.13 | 1 | 69   | 0.001    | 1 | R.MLAPVIDELANDFDGKAK.I + Oxidation (M) |

GPM-RM1051\_hplc#69\_gs1\_060210

log(e) = -51.4

RM\_2228\_trx\_[Thioredoxin]

1 MGKYIELTSDNFAQAKEGVALVDFWAPWCGPCRMLAPVIDELANDFDGKAKICKVNTDEQ 60  
 61 GDAAEFGVRSIPTLIFFKNGEVVDQLVGAQSKQAISDKLNSSL 104

| spectrum | log(e) | log(I) | m+h      | delta  | z | sequence                                                 |
|----------|--------|--------|----------|--------|---|----------------------------------------------------------|
| 28.1     | -2.7   | 3.21   | 1684.855 | -0.096 | 3 | [m <sup>2</sup> GKYIELTSDNFAQAK <sup>16</sup> egva       |
| 30.1     | -1.4   | 4.41   | 1499.739 | -0.075 | 2 | [mgk <sup>4</sup> YIELTSDNFAQAK <sup>16</sup> egva       |
| 40.1     | -4.2   | 3.47   | 1962.990 | -0.117 | 3 | gpcr <sup>34</sup> MLAPVIDELANDFDGKAK <sup>51</sup> ickv |
| 63.1     | -6.4   | 2.77   | 1763.858 | 0.894  | 3 | gpcr <sup>34</sup> MLAPVIDELANDFDGK <sup>49</sup> akic   |
| 55.1     | -1.7   | 3.02   | 1763.858 | 0.134  | 2 | gpcr <sup>34</sup> MLAPVIDELANDFDGK <sup>49</sup> akic   |
| 44.1     | -1.6   | 4.33   | 1763.858 | -0.115 | 2 | gpcr <sup>34</sup> MLAPVIDELANDFDGK <sup>49</sup> akic   |
| 31.1     | -7.3   | 4.22   | 1720.815 | -0.086 | 2 | kick <sup>55</sup> VNTDEQGDAAEFGVR <sup>70</sup> sipt    |
| 42.1     | -2.2   | 4.48   | 1065.635 | -0.063 | 2 | fgvr <sup>71</sup> SIPTLIFFK <sup>79</sup> ngev          |
| 26.1     | -4.6   | 4.30   | 1443.745 | -0.076 | 2 | iffk <sup>80</sup> NGEVVDQLVGAQSK <sup>93</sup> qais     |

Mascot-RM1051\_hplc#70\_gs2\_060210

Score: 879 Queries matched: 23

Ribosomal protein L7/L12 [*Campylobacter coli* RM2228]

1 MAISKEDVLEFISNLSVLELSELVKEFEKFGVSAAPVMVAGGAAAGGAA  
 51 AAEEKTEFDIVLDGGAKKIEVIKIVRALTGLGLKEAKDAVEQTPSTLK  
 101 EGVAKADAEAAKKQLEEAGAKVELK

| Observed | Mr(expt) | Mr(calc) | Delta | Miss | Score | Expect | Rank | Peptide   |
|----------|----------|----------|-------|------|-------|--------|------|-----------|
| 503.27   | 502.26   | 502.28   | -0.01 | 0    | 38    | 0.4    | 1    | K.EGVAK.A |

|         |         |         |       |   |      |          |   |                                                             |
|---------|---------|---------|-------|---|------|----------|---|-------------------------------------------------------------|
| 301.18  | 600.35  | 600.38  | -0.03 | 0 | 28   | 19       | 1 | K.IEVIK.I                                                   |
| 365.22  | 728.42  | 728.48  | -0.06 | 1 | 39   | 1.3      | 1 | K.KIEVIK.I                                                  |
| 367.16  | 732.30  | 732.33  | -0.03 | 0 | 33   | 4.9      | 1 | K.ADAEEAK.K                                                 |
| 386.74  | 771.46  | 771.49  | -0.02 | 0 | 52   | 0.07     | 1 | R.ALTGLGLK.E                                                |
| 845.39  | 844.38  | 844.43  | -0.05 | 0 | 35   | 3.2      | 1 | K.QLEEAGAK.V                                                |
| 423.20  | 844.39  | 844.43  | -0.03 | 0 | (33) | 5.7      | 2 | K.QLEEAGAK.V                                                |
| 431.21  | 860.41  | 860.42  | -0.02 | 1 | 52   | 0.059    | 1 | K.ADAEEAKK.Q                                                |
| 487.24  | 972.46  | 972.52  | -0.06 | 1 | 58   | 0.015    | 1 | K.KQLEEAGAK.V                                               |
| 594.76  | 1187.50 | 1187.60 | -0.10 | 0 | (49) | 0.11     | 1 | K.DAVEQTPSTLK.E                                             |
| 1188.58 | 1187.57 | 1187.60 | -0.03 | 0 | 51   | 0.066    | 1 | K.DAVEQTPSTLK.E                                             |
| 682.33  | 1362.65 | 1362.70 | -0.05 | 0 | 79   | 0.00012  | 1 | K.TEFDIVLVDGGAK.K                                           |
| 617.72  | 1850.14 | 1850.21 | -0.07 | 3 | 50   | 0.087    | 1 | K.KIEVIKIVRALTGLGLK.E                                       |
| 749.67  | 2245.99 | 2246.10 | -0.11 | 0 | (37) | 1.6      | 1 | K.FGVSAAPVMVAGGAAAGGAAAAAEEK.T + Oxidation (M)              |
| 749.69  | 2246.06 | 2246.10 | -0.04 | 0 | 67   | 0.0019   | 1 | K.FGVSAAPVMVAGGAAAGGAAAAAEEK.T + Oxidation (M)              |
| 749.80  | 2246.38 | 2246.10 | 0.28  | 0 | (25) | 22       | 1 | K.FGVSAAPVMVAGGAAAGGAAAAAEEK.T + Oxidation (M)              |
| 759.38  | 2275.12 | 2275.22 | -0.10 | 0 | 70   | 0.00092  | 1 | K.EDVLEFISNLSVLELSELVK.E                                    |
| 892.47  | 2674.37 | 2674.47 | -0.09 | 1 | 68   | 0.0014   | 1 | M.AISKEDVLEFISNLSVLELSELVK.E                                |
| 669.70  | 2674.77 | 2674.47 | 0.30  | 1 | (32) | 3.9      | 1 | M.AISKEDVLEFISNLSVLELSELVK.E                                |
| 892.60  | 2674.78 | 2674.47 | 0.31  | 1 | (23) | 31       | 1 | M.AISKEDVLEFISNLSVLELSELVK.E                                |
| 669.85  | 2675.37 | 2674.47 | 0.90  | 1 | (37) | 1.7      | 1 | M.AISKEDVLEFISNLSVLELSELVK.E                                |
| 835.43  | 3337.67 | 3336.76 | 0.91  | 2 | 65   | 0.0034   | 1 | M.AISKEDVLEFISNLSVLELSELVKEFEEK.F                           |
| 898.92  | 3591.66 | 3590.79 | 0.87  | 1 | 94   | 3.3e-006 | 1 | K.FGVSAAPVMVAGGAAAGGAAAAAEEKTEFDIVLVDGGAK.K + Oxidation (M) |

GPM-RM1051\_hplc#70\_gs2\_060210

log(e) = -79.1

RM2228 rplL [50S ribosomal protein L7/L12]

|     |   |                                                             |     |
|-----|---|-------------------------------------------------------------|-----|
| 1   | M | AISKEDVLEFISNLSVLELSELVKEFEEKFGVSAAPVMVAGGAAAGGAAAAAEEKTEFD | 60  |
| 61  | I | VLVDGGAKKIEVIKIVRALTGLGLKEAKDAVEQTPSTLKEGVAKADAEAAKQLEEAGA  | 120 |
| 121 | K | VELK                                                        | 125 |

| spectrum | log(e) | log(I) | m+h      | delta  | z | sequence                                                                      |
|----------|--------|--------|----------|--------|---|-------------------------------------------------------------------------------|
| 52.1     | -2.2   | 3.05   | 3337.767 | 0.888  | 4 | [m <sup>2</sup> AISKEDVLEFISNLSVLELSELVKEFEEK <sup>30</sup> fgvs              |
| 48.1     | -6.1   | 3.58   | 2675.476 | -0.101 | 3 | [m <sup>2</sup> AISKEDVLEFISNLSVLELSELVK <sup>25</sup> efee                   |
| 54.1     | -4.1   | 3.67   | 2276.229 | -0.172 | 3 | aisk <sup>6</sup> EDVLEFISNLSVLELSELVK <sup>25</sup> efee                     |
| 30.1     | -1.3   | 3.44   | 3591.806 | -0.113 | 4 | feek <sup>31</sup> FGVSAAPVMVAGGAAAGGAAAAAEEKTEFDIVLVDGGAK <sup>69</sup> kiev |
| 28.1     | -1.1   | 3.37   | 3591.806 | 0.885  | 4 | feek <sup>31</sup> FGVSAAPVMVAGGAAAGGAAAAAEEKTEFDIVLVDGGAK <sup>69</sup> kiev |
| 20.1     | -6.2   | 3.21   | 2247.114 | -0.059 | 3 | feek <sup>31</sup> FGVSAAPVMVAGGAAAGGAAAAAEEK <sup>56</sup> tefd              |
| 27.1     | -4.1   | 4.67   | 1363.712 | -0.052 | 2 | aek <sup>57</sup> TEFDIVLVDGGAK <sup>69</sup> kiev                            |
| 35.1     | -3.5   | 2.72   | 1851.217 | -0.061 | 3 | ggak <sup>70</sup> KIEVIKIVRALTGLGLK <sup>86</sup> eakd                       |
| 12.1     | -2.1   | 4.37   | 1188.612 | -0.093 | 2 | keak <sup>90</sup> DAVEQTPSTLK <sup>100</sup> egva                            |
| 14.1     | -1.7   | 3.04   | 1002.548 | -0.027 | 2 | akda <sup>92</sup> VEQTPSTLK <sup>100</sup> egva                              |
| 5.1      | -2.6   | 3.96   | 861.432  | -0.026 | 2 | gvak <sup>106</sup> ADAEAAK <sup>113</sup> qlee                               |
| 4.1      | -1.6   | 3.29   | 790.395  | -0.036 | 2 | vaka <sup>107</sup> DAEAAK <sup>113</sup> qlee                                |
| 10.1     | -1.5   | 3.64   | 973.532  | -0.070 | 2 | eeak <sup>113</sup> KQLEEAGAK <sup>121</sup> velk]                            |

## RM1865 Protein Biomarkers

Mascot-RM1865\_hplc#42\_gs1\_060213

Mass: 7444    Score: 227    Queries matched: 6

conserved domain protein [*Campylobacter jejuni* subsp. *jejuni* HB93-13]

1    MAK**DANGTELNAGDSVSVIK**DLKVK**GASTTLKR**GTTIKNIKLT**SK**EGEIE  
 51    AR**VDKFGVIVLKTEFLK**KI

| Observed | Mr(expt) | Mr(calc) | Delta | Miss | Score | Expect   | Rank | Peptide               |
|----------|----------|----------|-------|------|-------|----------|------|-----------------------|
| 519.32   | 518.31   | 518.31   | 0.01  | 0    | 15    | 90       | 3    | R.GTTIK.N             |
| 319.18   | 636.34   | 636.35   | -0.01 | 0    | 19    | 81       | 8    | K.TEFLK.K             |
| 388.26   | 774.51   | 774.50   | 0.01  | 0    | 38    | 1.3      | 1    | K.FGVIVLK.T           |
| 417.25   | 832.49   | 832.48   | 0.01  | 1    | 40    | 0.83     | 1    | K.GASTTLKR.G          |
| 373.24   | 1116.70  | 1116.69  | 0.01  | 1    | 35    | 2.3      | 1    | R.VDKFGVIVLK.T        |
| 845.43   | 1688.84  | 1688.82  | 0.01  | 0    | 80    | 4.8e-005 | 1    | K.DANGTELNAGDSVSVIK.D |

Mascot-RM1865\_hplc#42\_gs1\_060213

Mass: 7531    Score: 145    Queries matched: 5

phnA protein [*Campylobacter coli* RM2228]

1    MPK**DANGTELNAGDSVSVIK**DLKVK**GASTTLKR**GTTIKNIKLT**SK**ENEIE  
 51    AK**VDKFGVIVLKTEFLK**KI

| Observed | Mr(expt)  | Mr(calc)  | Delta   | Miss | Score | Sequence       |
|----------|-----------|-----------|---------|------|-------|----------------|
| 519.3207 | 518.3134  | 518.3064  | 0.0070  | 0    | 15    | R.GTTIK.N      |
| 319.1768 | 636.3391  | 636.3483  | -0.0091 | 0    | 19    | K.TEFLK.K      |
| 388.2604 | 774.5062  | 774.5003  | 0.0059  | 0    | 38    | K.FGVIVLK.T    |
| 417.2498 | 832.4851  | 832.4766  | 0.0085  | 1    | 40    | K.GASTTLKR.G   |
| 373.2392 | 1116.6959 | 1116.6906 | 0.0053  | 1    | 35    | K.VDKFGVIVLK.T |

### "Composite" and *de novo* sequence

\*\*\*\*\*

1    MPK**DANGTELNAGDSVSVIK**DLKVK**GASTTLKR**GTTIKNIKLT**SK**EGEIE  
 51    **AKVDKFGVIVLKTEFLK**KI

*De novo* confirms <sup>46</sup>EGEIEA<sup>52</sup>K peptide. G from *Cjj* and K from *Cc*.

"Composite" peptide.

\*\*\*\*\*

GPM Analysis of "Composite"/*de novo* Sequence RM1865\_hplc#42\_gs1\_060213

**log(e) = - 12.8 RM1865\_phnA\_[Composite\_and\_denovo\_phnA\_protein\_Cjj\_HB93\_13\_and\_RM2228]**

1 MPK**DANGTELNAGDSVSVIK**DLKVKGASTTLKRGTTIKNIKLTSKEGEIE 50  
 51 AK**VDFKFGVIVLK**TEFLKKI 69

| spectrum | log(e) | log(I) | m+h      | delta  | z | sequence                                                      |
|----------|--------|--------|----------|--------|---|---------------------------------------------------------------|
| 30.1     | -1.8   | 2.68   | 1689.830 | 0.016  | 2 | [mpk <sup>4</sup> <b>DANGTELNAGDSVSVIK</b> <sup>20</sup> dlkv |
| 36.1     | -2.4   | 3.37   | 1117.699 | -0.009 | 3 | ieak <sup>53</sup> <b>VDFKFGVIVLK</b> <sup>62</sup> tefl      |
| 38.1     | -2.4   | 3.62   | 775.509  | 0.009  | 2 | kvd <sup>56</sup> <b>FGVIVLK</b> <sup>62</sup> tefl           |

Mascot-RM1865\_hplc#64\_gs1\_060213

Score: 712 Queries matched: 20

Ribosomal protein L7/L12 [Campylobacter coli RM2228]

1 **MAISKEDVLEFISNLSVLELSELVKEFEEKFGVSAAPVMVAGGAAAGGAA**  
 51 **AAAEKTEFDIVLDGGAKKIEVIKIVRALTGLGLKEAKDAVEQTPSTLK**  
 101 **EGVAKADAEAAKKQLEEAGAKVELK**

| Observed Mr(expt) | Mr(calc) | Delta   | Miss  | Score | Expect | Rank     | Peptide                                                      |
|-------------------|----------|---------|-------|-------|--------|----------|--------------------------------------------------------------|
| 503.28            | 502.28   | 502.28  | 0.00  | 0     | 36     | 0.71     | 2 K.EGVAK.A                                                  |
| 301.20            | 600.38   | 600.38  | -0.00 | 0     | 30     | 11       | 1 K.IEVIK.I                                                  |
| 365.24            | 728.46   | 728.48  | -0.02 | 1     | 39     | 1.1      | 1 K.KIEVIK.I                                                 |
| 367.17            | 732.33   | 732.33  | 0.00  | 0     | 37     | 1.7      | 1 K.ADAEEAK.K                                                |
| 386.74            | 771.47   | 771.49  | -0.02 | 0     | 47     | 0.17     | 1 R.ALTGLGLK.E                                               |
| 423.23            | 844.44   | 844.43  | 0.01  | 0     | 45     | 0.32     | 1 K.QLEEAGAK.V                                               |
| 431.21            | 860.41   | 860.42  | -0.01 | 1     | 50     | 0.077    | 1 K.ADAEEAKK.Q                                               |
| 487.25            | 972.49   | 972.52  | -0.03 | 1     | 51     | 0.064    | 1 K.KQLEEAGAK.V                                              |
| 594.79            | 1187.56  | 1187.60 | -0.04 | 0     | 49     | 0.088    | 1 K.DAVEQTPSTLK.E                                            |
| 1188.61           | 1187.60  | 1187.60 | 0.00  | 0     | (41)   | 0.5      | 1 K.DAVEQTPSTLK.E                                            |
| 682.36            | 1362.70  | 1362.70 | -0.01 | 0     | 79     | 7.7e-005 | 1 K.TEFDIVLDGGAK.K                                           |
| 682.50            | 1362.99  | 1362.70 | 0.28  | 0     | (65)   | 0.0013   | 1 K.TEFDIVLDGGAK.K                                           |
| 749.71            | 2246.10  | 2246.10 | 0.00  | 0     | 65     | 0.0011   | 1 K.FGVSAAPVMVAGGAAAGGAAAAAEEK.T + Oxidation (M)             |
| 749.71            | 2246.10  | 2246.10 | 0.00  | 0     | (59)   | 0.005    | 1 K.FGVSAAPVMVAGGAAAGGAAAAAEEK.T + Oxidation (M)             |
| 759.41            | 2275.20  | 2275.22 | -0.02 | 0     | 67     | 0.00069  | 1 K.EDVLEFISNLSVLELSELVKE                                    |
| 759.74            | 2276.19  | 2275.22 | 0.97  | 0     | (18)   | 61       | 4 K.EDVLEFISNLSVLELSELVKE                                    |
| 892.47            | 2674.39  | 2674.47 | -0.07 | 1     | 61     | 0.0022   | 1 M.AISKEDVLEFISNLSVLELSELVKE                                |
| 669.63            | 2674.49  | 2674.47 | 0.02  | 1     | (50)   | 0.026    | 1 M.AISKEDVLEFISNLSVLELSELVKE                                |
| 892.83            | 2675.47  | 2674.47 | 1.00  | 1     | (21)   | 20       | 1 M.AISKEDVLEFISNLSVLELSELVKE                                |
| 898.71            | 3590.83  | 3590.79 | 0.04  | 1     | 56     | 0.0041   | 1 K.FGVSAAPVMVAGGAAAGGAAAAAEEKTEFDIVLDGGAK.K + Oxidation (M) |

GPM-RM1865\_hplc#64\_gs1\_060213

log(e) = -81.7

RM2228 rpL [50S ribosomal protein L7/L12]

1 MAISKEDVLEFISNLSVLELSELVKEFEKFGVSAAPVMVAGGAAAGGAAAAAEEKTEFD 60  
 61 IVLVDGGAKKIEVIKIVRALTGLGLKEAKDAVEQTPSTLKEGVAKADAEAEAKKQLEEAGA 120  
 121 KVELK 125

| spectrum | log(e) | log(I) | m+h      | delta  | z | sequence                                                                      |
|----------|--------|--------|----------|--------|---|-------------------------------------------------------------------------------|
| 54.1     | -1.9   | 3.50   | 3337.767 | -0.040 | 4 | [m <sup>2</sup> AISKEDVLEFISNLSVLELSELVKEFEK <sup>30</sup> fgvs               |
| 51.1     | -6.7   | 3.79   | 2675.476 | -0.073 | 3 | [m <sup>2</sup> AISKEDVLEFISNLSVLELSELVK <sup>25</sup> efee                   |
| 60.1     | -4.6   | 3.51   | 2276.229 | -0.031 | 3 | aisk <sup>6</sup> EDVLEFISNLSVLELSELVK <sup>25</sup> efee                     |
| 32.1     | -1.5   | 3.00   | 3591.806 | 1.009  | 4 | feek <sup>31</sup> FGVSAAPVMVAGGAAAGGAAAAAEEKTEFDIVLVDGGAK <sup>69</sup> kiev |
| 45.1     | -1.4   | 2.48   | 3591.806 | 0.009  | 4 | feek <sup>31</sup> FGVSAAPVMVAGGAAAGGAAAAAEEKTEFDIVLVDGGAK <sup>69</sup> kiev |
| 22.1     | -5.3   | 3.29   | 2247.114 | -0.008 | 3 | feek <sup>31</sup> FGVSAAPVMVAGGAAAGGAAAAAEEK <sup>56</sup> tefd              |
| 29.1     | -4.0   | 4.52   | 1363.712 | -0.012 | 2 | aEEK <sup>57</sup> TEFDIVLVDGGAK <sup>69</sup> kiev                           |
| 40.1     | -3.0   | 2.56   | 1851.217 | -0.014 | 3 | ggak <sup>70</sup> KIEVIKIVRALTGLGLK <sup>86</sup> eakd                       |
| 24.1     | -1.4   | 4.40   | 772.494  | -0.019 | 2 | kivr <sup>79</sup> ALTGLGLK <sup>86</sup> eakd                                |
| 13.1     | -1.9   | 4.06   | 1188.612 | -0.042 | 2 | keak <sup>90</sup> DAVEQTPSTLK <sup>100</sup> egva                            |
| 14.1     | -1.8   | 2.98   | 1002.548 | -0.010 | 2 | akda <sup>92</sup> VEQTPSTLK <sup>100</sup> egva                              |
| 16.1     | -1.1   | 2.70   | 1687.851 | -0.004 | 3 | gvak <sup>106</sup> ADAEAEAKKQLEEAGAK <sup>121</sup> velk]                    |
| 5.1      | -1.1   | 3.24   | 861.432  | -0.006 | 2 | gvak <sup>106</sup> ADAEAEAKK <sup>113</sup> qlee                             |
| 4.1      | -1.7   | 2.93   | 790.395  | -0.005 | 2 | vaka <sup>107</sup> DAEAEAKK <sup>113</sup> qlee                              |

Mascot-RM1865\_hplc#65\_gs1\_060213

Score: 464 Queries matched: 10

Thioredoxin [*Campylobacter jejuni* RM2228]

1 MGKYIELTSDNFAQAKEGVALVDFWAPWCGPCRMLAPVIDELANDFDGKA  
 51 KICKVNTDEQGDAAEFGVRSIPTLIFFKNGEVVDQLVGAQSKQAISDKL  
 101 NSLL

| Observed | Mr(expt) | Mr(calc) | Delta | Miss | Score | Expect | Rank | Peptide       |
|----------|----------|----------|-------|------|-------|--------|------|---------------|
| 331.18   | 660.34   | 660.34   | -0.01 | 0    | 40    | 1.1    | 1    | K.QAISDK.L    |
| 533.31   | 1064.61  | 1064.63  | -0.02 | 0    | (32)  | 4.3    | 1    | R.SIPTLIFFK.N |
| 533.32   | 1064.63  | 1064.63  | 0.00  | 0    | 39    | 0.8    | 1    | R.SIPTLIFFK.N |
| 533.33   | 1064.65  | 1064.63  | 0.02  | 0    | (36)  | 1.5    | 1    | R.SIPTLIFFK.N |

|        |         |         |       |   |    |          |   |                                        |
|--------|---------|---------|-------|---|----|----------|---|----------------------------------------|
| 722.38 | 1442.74 | 1442.74 | 0.00  | 0 | 63 | 0.003    | 1 | K.NGEVVDQLVGAQSK.Q                     |
| 750.38 | 1498.75 | 1498.73 | 0.02  | 0 | 81 | 3.8e-005 | 1 | K.YIELTSDNFAQAK.E                      |
| 562.29 | 1683.86 | 1683.85 | 0.01  | 1 | 58 | 0.0074   | 1 | M.GKYIELTSDNFAQAK.E                    |
| 860.91 | 1719.81 | 1719.81 | 0.01  | 0 | 66 | 0.0011   | 1 | K.VNTDEQGDLAEEFGVR.S                   |
| 588.62 | 1762.84 | 1762.84 | -0.01 | 0 | 52 | 0.031    | 1 | R.MLAPVIDELANDFDGK.A + Oxidation (M)   |
| 655.00 | 1961.99 | 1961.98 | 0.01  | 1 | 65 | 0.0015   | 1 | R.MLAPVIDELANDFDGKAK.I + Oxidation (M) |

GPM-RM1865\_hplc#65\_gs1\_060213

log(e) = -57.5

RM2228 trx [Thioredoxin]

1 MGKYIELTSDNFAQAKEGVALVDFWAPWCGPCRMLAPVIDELANDFDGKAKICKVNTDEQ 60  
 61 GDLAEEFGVRSIPTLIFFKNGEVVDQLVGAQSKQAISDKLNSLL 104

| spectrum | log(e) | log(I) | m+h      | delta  | z | sequence                                                 |
|----------|--------|--------|----------|--------|---|----------------------------------------------------------|
| 18.1     | -3.2   | 3.00   | 1684.855 | 0.008  | 3 | [m <sup>2</sup> GKYIELTSDNFAQAK <sup>16</sup> egva       |
| 20.1     | -2.0   | 3.60   | 1499.739 | 0.009  | 2 | [mgk <sup>4</sup> YIELTSDNFAQAK <sup>16</sup> egva       |
| 32.1     | -4.3   | 3.28   | 1962.990 | 0.001  | 3 | gpcr <sup>34</sup> MLAPVIDELANDFDGKAK <sup>51</sup> ickv |
| 35.1     | -4.8   | 3.44   | 1763.858 | -0.003 | 3 | gpcr <sup>34</sup> MLAPVIDELANDFDGK <sup>49</sup> akic   |
| 22.1     | -8.0   | 3.49   | 1720.815 | 0.005  | 2 | kick <sup>55</sup> VNTDEQGDLAEEFGVR <sup>70</sup> sipt   |
| 34.1     | -2.1   | 3.88   | 1065.635 | -0.024 | 2 | fgvr <sup>71</sup> SIPTLIFFK <sup>79</sup> ngev          |
| 16.1     | -4.3   | 3.31   | 1443.745 | 0.003  | 2 | iffk <sup>80</sup> NGEVVDQLVGAQSK <sup>93</sup> qais     |
| 30.1     | -2.4   | 2.91   | 1184.664 | -0.007 | 2 | aqsk <sup>94</sup> QAISDKLNSLL <sup>104</sup> ]          |

## *Campylobacter lari*

### RM2100 Protein Biomarkers

Mascot-RM2100\_hplc#50\_gs1\_060630

Mass: 6989 Score: 270 Queries matched: 8

Ribosomal protein L29 [*Campylobacter lari* RM2100]

1 MKYTEIKDKTAGELATMLKEKVVLLFTLRQKLKTMQLTNPKEISEVKKDI  
 51 ARINTAISALK

| Observed Mr(expt) | Mr(calc) | DeltaMissScore | ExpectRank       | Peptide                       |
|-------------------|----------|----------------|------------------|-------------------------------|
| 416.77            | 831.52   | 831.47         | 0.05 1 39 1.2 2  | K.EISEVKK.D                   |
| 431.30            | 860.58   | 860.55         | 0.03 0 (29) 12 1 | K.VLLFTLR.Q                   |
| 431.32            | 860.62   | 860.55         | 0.07 0 42 0.66 1 | K.VLLFTLR.Q                   |
| 465.82            | 929.63   | 929.55         | 0.07 0 44 0.43 1 | R.INTAISALK.-                 |
| 474.77            | 947.53   | 947.47         | 0.06 0 38 1.4 1  | K.TMQLTNPKE + Oxidation (M)   |
| 495.35            | 988.69   | 988.64         | 0.04 1 41 0.73 1 | K.KVLLFTLR.Q                  |
| 525.82            | 1049.62  | 1049.54        | 0.08 0 44 0.32 1 | K.TAGELATMLKE + Oxidation (M) |
| 397.26            | 1188.76  | 1188.65        | 0.10 1 23 48 2   | K.LKTMQLTNPKE + Oxidation (M) |

Mascot-RM2100\_hplc#51\_gs1\_060630

Score: 337 Queries matched: 10

cytochrome C4, putative [*Campylobacter lari* RM2100]

1 MKKLLVLSTLACLSVSAFAADGATLYKKCAVCHGAK**ADKVYLNKVPALNT**  
 51 **LTA**ERLQYMK**DYAAGKR**NAYGQGAIMKINLK**GLTEADFK**AIEEYIESLK  
 101 **K**

| Observed Mr(expt) | Mr(calc) | DeltaMissScore | ExpectRank         | Peptide                        |
|-------------------|----------|----------------|--------------------|--------------------------------|
| 318.69            | 635.37   | 635.36         | 0.00 0 19 90 4     | K.VYLNK.V                      |
| 390.71            | 779.41   | 779.39         | 0.02 1 31 6.2 1    | K.DYAAGKR.N                    |
| 440.74            | 879.46   | 879.43         | 0.02 0 32 4.6 1    | K.GLTEADFK.A                   |
| 475.77            | 949.53   | 949.52         | 0.01 1 (23) 38 2   | K.ADKVYLNK.V                   |
| 317.53            | 949.57   | 949.52         | 0.04 1 37 1.6 1    | K.ADKVYLNK.V                   |
| 534.77            | 1067.53  | 1067.51        | 0.02 0 20 78 3     | R.NAYGQGAIMK.I + Oxidation (M) |
| 628.37            | 1254.72  | 1254.69        | 0.03 0 66 0.0022 1 | K.VPALNTLTAER.L                |
| 441.60            | 1321.77  | 1321.71        | 0.06 1 43 0.37 1   | K.AIEEYIESLKK.-                |
| 625.05            | 1872.14  | 1872.05        | 0.09 1 59 0.011 1  | K.VYLNKVPALNTLTAER.L           |
| 546.82            | 2183.24  | 2183.14        | 0.11 2 31 7 2      | K.GLTEADFKAIEEYIESLKK.-        |

Mascot-RM2100\_hplc#51\_gs2\_060630

Score: 189 Queries matched: 5

Cytochrome C4, putative [*Campylobacter lari* RM2100]

1 MKKLLVLSTLACLSVSAFAADGATLYKKCAVCHGAKADK**VYLNKVPALNT**  
 51 **LTA**ERLQYMK**DYAAGKR**NAYGQGAIMKINLK**GLTEADFK**AIEEYIESLK  
 101 **K**



| Observed Mr(expt) | Mr(calc) | Delta   | MissScore | Expect | Rank | Peptide |   |                                |
|-------------------|----------|---------|-----------|--------|------|---------|---|--------------------------------|
| 440.73            | 879.44   | 879.43  | 0.01      | 0      | 32   | 4.7     | 1 | K.GLTEADFK.A                   |
| 534.77            | 1067.53  | 1067.51 | 0.02      | 0      | 20   | 81      | 1 | R.NAYGQGAIMK.I + Oxidation (M) |
| 628.38            | 1254.74  | 1254.69 | 0.05      | 0      | 59   | 0.0097  | 1 | K.VPALNTLTAAER.L               |
| 441.60            | 1321.77  | 1321.71 | 0.06      | 1      | 44   | 0.33    | 1 | K.AIEEYIESLKK.-                |
| 625.04            | 1872.11  | 1872.05 | 0.06      | 1      | 34   | 3.3     | 1 | K.VYLNKVPALNTLTAAER.L          |

Mascot-RM2100\_hplc#73\_gs1\_060630

Mass: 11545 Score: 683 Queries matched: 21

Thioredoxin [*Campylobacter lari* RM2100]

1 MGKYIDLTAE~~NF~~QA~~KE~~EGVALVDFWAPWCGPCR~~MLAPVIDELAN~~DFD~~GKA~~

51 KICKVN~~TEE~~EQ~~GD~~LAAQFGVRSIPTIFFFKDGEVVDQLVGAQSKQVLADKL

101 NSLL

| Observed | Mr(expt)  | Mr(calc)  | Delta   | MissScore | Expect | Rank    | Peptide |                                                     |
|----------|-----------|-----------|---------|-----------|--------|---------|---------|-----------------------------------------------------|
| 310.1772 | 618.3399  | 618.3523  | -0.0124 | 1         | 27     | 27      | 3       | K.AKICK.V                                           |
| 337.2009 | 672.3873  | 672.3806  | 0.0067  | 0         | 33     | 7.4     | 1       | K.QVLADK.L                                          |
| 550.2948 | 1098.5751 | 1098.6113 | -0.0362 | 0         | 45     | 0.37    | 1       | R.SIPTIFFFK.D                                       |
| 722.8297 | 1443.6449 | 1443.7205 | -0.0756 | 0         | 81     | 8.3e-05 | 1       | K.DGEVVDQLVGAQSK.Q                                  |
| 482.2617 | 1443.7633 | 1443.7205 | 0.0428  | 0         | (51)   | 0.096   | 1       | K.DGEVVDQLVGAQSK.Q                                  |
| 742.3284 | 1482.6422 | 1482.7354 | -0.0932 | 0         | 57     | 0.019   | 1       | K.YIDLTAE <del>NF</del> QA <del>KE</del>            |
| 495.2712 | 1482.7918 | 1482.7354 | 0.0564  | 0         | (33)   | 5.6     | 1       | K.YIDLTAE <del>NF</del> QA <del>KE</del>            |
| 556.9556 | 1667.8450 | 1667.8518 | -0.0068 | 1         | 66     | 0.0029  | 1       | M.GKYIDLTAE <del>NF</del> QA <del>KE</del>          |
| 556.9872 | 1667.9397 | 1667.8518 | 0.0879  | 1         | (32)   | 6.5     | 1       | M.GKYIDLTAE <del>NF</del> QA <del>KE</del>          |
| 578.6144 | 1732.8215 | 1732.8380 | -0.0165 | 0         | 62     | 0.0065  | 1       | K.VN <del>TEE</del> EQ <del>GD</del> LAAQFGVRS      |
| 578.6359 | 1732.8858 | 1732.8380 | 0.0479  | 0         | (36)   | 2.8     | 1       | K.VN <del>TEE</del> EQ <del>GD</del> LAAQFGVRS      |
| 578.6573 | 1732.9502 | 1732.8380 | 0.1122  | 0         | (35)   | 3.6     | 1       | K.VN <del>TEE</del> EQ <del>GD</del> LAAQFGVRS      |
| 588.6087 | 1762.8043 | 1762.8447 | -0.0404 | 0         | 64     | 0.0043  | 1       | R.MLAPVIDELAN <del>DFD</del> GK.A + Oxidation (M)   |
| 588.6520 | 1762.9341 | 1762.8447 | 0.0894  | 0         | (40)   | 1.2     | 1       | R.MLAPVIDELAN <del>DFD</del> GK.A + Oxidation (M)   |
| 654.9613 | 1961.8620 | 1961.9768 | -0.1147 | 1         | 66     | 0.0024  | 1       | R.MLAPVIDELAN <del>DFD</del> GKAK.I + Oxidation (M) |
| 491.4984 | 1961.9645 | 1961.9768 | -0.0122 | 1         | (49)   | 0.13    | 1       | R.MLAPVIDELAN <del>DFD</del> GKAK.I + Oxidation (M) |
| 712.3565 | 2134.0476 | 2134.0476 | 0.0000  | 1         | 116    | 2.7e-08 | 1       | K.ICKVN <del>TEE</del> EQ <del>GD</del> LAAQFGVRS   |
| 534.5446 | 2134.1493 | 2134.0476 | 0.1017  | 1         | (33)   | 6.1     | 1       | K.ICKVN <del>TEE</del> EQ <del>GD</del> LAAQFGVRS   |
| 842.3938 | 2524.1596 | 2524.3212 | -0.1616 | 1         | 65     | 0.0033  | 1       | R.SIPTIFFFKDGEVVDQLVGAQSK.Q                         |
| 632.0727 | 2524.2618 | 2524.3212 | -0.0595 | 1         | (33)   | 6.3     | 2       | R.SIPTIFFFKDGEVVDQLVGAQSK.Q                         |
| 842.4715 | 2524.3925 | 2524.3212 | 0.0713  | 1         | (18)   | 1.7e+02 | 2       | R.SIPTIFFFKDGEVVDQLVGAQSK.Q                         |

## RM1890 Protein Biomarkers

Mascot-RM1890\_hplc#50\_gs1\_060702

Mass: 11142 Score: 319 Queries matched: 10

Cytochrome C4, putative [*Campylobacter lari* RM2100]

1 MKKLLVLSTLACLSVSAFAADGATLYKKCAVCHGAK**ADKVYLNKVPALNT**  
51 **LTA**AERLQYMK**DYAAGK**R**NAYGQGAIMK**INLK**GLTEADFK**AIEEYIESLK  
101 **K**

| Observed Mr(expt) | Mr(calc) | Delta   | MissScore | Expect | Rank      | Peptide                          |
|-------------------|----------|---------|-----------|--------|-----------|----------------------------------|
| 312.67            | 623.33   | 623.29  | 0.03      | 0      | 21 42     | 1 K.DYAAGK.R                     |
| 318.71            | 635.40   | 635.36  | 0.03      | 0      | 21 59     | 1 K.VYLNK.V                      |
| 440.74            | 879.47   | 879.43  | 0.03      | 0      | 40 0.72   | 1 K.GLTEADFK.A                   |
| 475.80            | 949.58   | 949.52  | 0.06      | 1      | 37 1.8    | 1 K.ADKVYLNK.V                   |
| 534.80            | 1067.59  | 1067.51 | 0.08      | 0      | 19 82     | 1 R.NAYGQGAIMK.I + Oxidation (M) |
| 597.86            | 1193.71  | 1193.62 | 0.09      | 0      | 44 0.31   | 1 K.AIEEYIESLK.K                 |
| 628.38            | 1254.75  | 1254.69 | 0.06      | 0      | 68 0.0013 | 1 K.VPALNTLTAER.L                |
| 419.28            | 1254.81  | 1254.69 | 0.11      | 0      | (24) 32   | 1 K.VPALNTLTAER.L                |
| 441.62            | 1321.84  | 1321.71 | 0.13      | 1      | 43 0.36   | 1 K.AIEEYIESLKK.-                |
| 546.85            | 2183.36  | 2183.14 | 0.23      | 2      | 26 19     | 1 K.GLTEADFKAIEEYIESLKK.-        |

---

Mascot-RM1890\_hplc#50\_gs2\_060702

Mass: 10262 Score: 309 Queries matched: 9

Ribosomal protein S15 [*Campylobacter lari* RM2100]

1 **MALDSAKKAEIVAK**FAR**KEGDTGSPEVQIALLSAR**ISDLTEHLKIYKK**DF**  
51 **SSRLG**LLKLVGQRKRLLSYLKRKDYQAYSK**LISELNLR**DK

| Observed Mr(expt) | Mr(calc) | Delta    | MissScore | Expect | Rank    | Peptide       |
|-------------------|----------|----------|-----------|--------|---------|---------------|
| 272.2040          | 542.3935 | 542.3791 | 0.0144    | 0      | 34 1.9  | 1 R.LGLLK.L   |
| 302.6923          | 603.3700 | 603.3228 | 0.0473    | 0      | 33 6.6  | 1 M.ALDSAK.K  |
| 306.1694          | 610.3242 | 610.2711 | 0.0531    | 0      | 16 91   | 10 K.DFSSR.L  |
| 379.7588          | 757.5031 | 757.4697 | 0.0334    | 1      | 46 0.39 | 5 K.KAEIVAK.F |

479.3061 956.5977 956.5654 0.0322 0 61 0.01 1 K.LISELNLR.D  
479.3354 956.6563 956.5654 0.0908 0 (35) 3.8 2 K.LISELNLR.D  
872.0211 1742.0276 1741.8846 0.1430 0 77 0.0002 1 K.EGDTGSPEVQIALLSAR.I  
624.3871 1870.1395 1869.9795 0.1599 1 42 0.59 1 R.KEGDTGSPEVQIALLSAR.I  
624.4094 1870.2063 1869.9795 0.2268 1 (32) 5.7 2 R.KEGDTGSPEVQIALLSAR.I

---

Mascot-RM1890\_hplc#70\_gs1\_060702

Mass: 11545 Score: 555 Queries matched: 15

Thioredoxin [*Campylobacter lari* RM2100]

1 MGKYIDLTAE~~N~~FAQAKEGVALVDFWAPWCGPCRMLAPVIDELANDFDGKA  
51 KICKVNTEEQGD~~L~~AAQFGVRSIPTIFFFKDGEVVDQLVGAQSKQVLADKL  
101 NSLL

| Observed | Mr(expt)  | Mr(calc)  | Delta   | Miss Score | Expect | Rank    | Peptide                                  |
|----------|-----------|-----------|---------|------------|--------|---------|------------------------------------------|
| 337.2217 | 672.4288  | 672.3806  | 0.0482  | 0          | 31     | 12      | 1 K.QVLADK.L                             |
| 550.3015 | 1098.5884 | 1098.6113 | -0.0229 | 0          | (42)   | 0.75    | 1 R.SIPTIFFFK.D                          |
| 550.3538 | 1098.6930 | 1098.6113 | 0.0817  | 0          | 45     | 0.31    | 1 R.SIPTIFFFK.D                          |
| 607.8962 | 1213.7778 | 1212.7077 | 1.0700  | 1          | 21     | 89      | 1 K.QVLADKLN <del>S</del> L.L-           |
| 722.8941 | 1443.7737 | 1443.7205 | 0.0533  | 0          | 80     | 0.00012 | 1 K.DGEVVDQLVGAQSK.Q                     |
| 482.2745 | 1443.8018 | 1443.7205 | 0.0813  | 0          | (69)   | 0.0015  | 1 K.DGEVVDQLVGAQSK.Q                     |
| 742.3703 | 1482.7260 | 1482.7354 | -0.0094 | 0          | 65     | 0.0038  | 1 K.YIDLTAE <del>N</del> FAQAK.E         |
| 495.2650 | 1482.7732 | 1482.7354 | 0.0378  | 0          | (58)   | 0.017   | 1 K.YIDLTAE <del>N</del> FAQAK.E         |
| 556.9942 | 1667.9607 | 1667.8518 | 0.1089  | 1          | 51     | 0.097   | 1 M.GKYIDLTAE <del>N</del> FAQAK.E       |
| 578.6548 | 1732.9426 | 1732.8380 | 0.1046  | 0          | 72     | 0.00079 | 1 K.VNTEEQGD <del>L</del> AAQFGVRS       |
| 578.6655 | 1732.9747 | 1732.8380 | 0.1368  | 0          | (23)   | 56      | 2 K.VNTEEQGD <del>L</del> AAQFGVRS       |
| 588.6607 | 1762.9603 | 1762.8447 | 0.1156  | 0          | 62     | 0.007   | 1 R.MLAPVIDELANDFDGK.A + Oxidation (M)   |
| 588.6823 | 1763.0252 | 1762.8447 | 0.1805  | 0          | (59)   | 0.013   | 1 R.MLAPVIDELANDFDGK.A + Oxidation (M)   |
| 655.0422 | 1962.1049 | 1961.9768 | 0.1281  | 1          | 61     | 0.008   | 1 R.MLAPVIDELANDFDGKAK.I + Oxidation (M) |
| 842.4952 | 2524.4638 | 2524.3212 | 0.1425  | 1          | 67     | 0.0019  | 1 R.SIPTIFFFKDGEVVDQLVGAQSK.Q            |

---

Mascot-RM1890\_hplc#70\_gs3\_060702

Mass: 13091 Score: 1230 Queries matched: 30

Ribosomal protein L7/L12 [*Campylobacter lari* RM2100]

1 MAITKEDVLEFISNLSVLELSELVKEFEKFGVSAAPVMVAGAAVAGAAG  
51 GAAEEKTEFDIVLQDGGDKKINVIKVVRRALTGLGLKEAKDAVEQTPSVLK  
101 EGVSKAEAEAAKKQLEEAGAKVELK

| Observed  | Mr(expt)  | Mr(calc)  | Delta   | Miss | Score | Expect  | Rank | Peptide                                        |
|-----------|-----------|-----------|---------|------|-------|---------|------|------------------------------------------------|
| 260.1626  | 518.3107  | 518.2700  | 0.0408  | 0    | 44    | 0.14    | 1    | K.EGVSK.A                                      |
| 293.7193  | 585.4241  | 585.3850  | 0.0391  | 0    | 30    | 10      | 1    | K.INVIK.V                                      |
| 293.7270  | 585.4394  | 585.3850  | 0.0544  | 0    | (25)  | 27      | 1    | K.INVIK.V                                      |
| 374.2150  | 746.4155  | 746.3446  | 0.0709  | 0    | 31    | 11      | 1    | K.AEAEAAK.K                                    |
| 386.7547  | 771.4948  | 771.4854  | 0.0094  | 0    | 54    | 0.058   | 1    | R.ALTGLGLK.E                                   |
| 423.2439  | 844.4732  | 844.4290  | 0.0442  | 0    | 46    | 0.33    | 1    | K.QLEEAGAK.V                                   |
| 438.2702  | 874.5258  | 874.4396  | 0.0862  | 1    | 50    | 0.13    | 1    | K.AEAEAAK.Q                                    |
| 487.2807  | 972.5469  | 972.5240  | 0.0229  | 1    | 62    | 0.0088  | 1    | K.KQLEEAGAK.V                                  |
| 593.8099  | 1185.6053 | 1185.6241 | -0.0188 | 0    | 51    | 0.088   | 1    | K.DAVEQTPSVLK.E                                |
| 593.8642  | 1185.7139 | 1185.6241 | 0.0898  | 0    | (34)  | 4.5     | 1    | K.DAVEQTPSVLK.E                                |
| 593.8860  | 1185.7574 | 1185.6241 | 0.1333  | 0    | (45)  | 0.36    | 1    | K.DAVEQTPSVLK.E                                |
| 657.8979  | 1313.7813 | 1313.7190 | 0.0623  | 1    | 67    | 0.0023  | 1    | K.QLEEAGAKVELK.-                               |
| 688.4099  | 1374.8053 | 1374.6990 | 0.1063  | 2    | 85    | 3.3e-05 | 1    | K.EGVSKAEAEAAKK.Q                              |
| 481.6481  | 1441.9226 | 1441.8140 | 0.1087  | 2    | 53    | 0.053   | 3    | K.KQLEEAGAKVELK.-                              |
| 757.9510  | 1513.8875 | 1513.7987 | 0.0888  | 1    | 75    | 0.00038 | 1    | K.EAKDAVEQTPSVLK.E                             |
| 782.9224  | 1563.8302 | 1563.7780 | 0.0522  | 1    | 70    | 0.001   | 1    | K.TEFDIVLQDGGDKK.I                             |
| 522.3037  | 1563.8892 | 1563.7780 | 0.1112  | 1    | (49)  | 0.12    | 1    | K.TEFDIVLQDGGDKK.I                             |
| 522.3139  | 1563.9198 | 1563.7780 | 0.1418  | 1    | (46)  | 0.24    | 1    | K.TEFDIVLQDGGDKK.I                             |
| 522.3444  | 1564.0115 | 1563.7780 | 0.2335  | 1    | (52)  | 0.057   | 1    | K.TEFDIVLQDGGDKK.I                             |
| 565.4223  | 1693.2449 | 1693.0977 | 0.1472  | 2    | 32    | 4.4     | 1    | K.INVIKVVRRALTGLGLK.E                          |
| 568.0119  | 1701.0138 | 1700.8580 | 0.1558  | 2    | 65    | 0.0039  | 1    | K.AEAEAAKKQLEEAGAK.V                           |
| 759.0684  | 2274.1833 | 2274.1313 | 0.0521  | 0    | 83    | 5.7e-05 | 1    | K.FGVSAAPVMVAGAAVAGAAGGAAEEK.T + Oxidation (M) |
| 569.6068  | 2274.3982 | 2274.1313 | 0.2669  | 0    | (24)  | 39      | 3    | K.FGVSAAPVMVAGAAVAGAAGGAAEEK.T + Oxidation (M) |
| 759.3000  | 2274.8782 | 2274.1313 | 0.7469  | 0    | (39)  | 1.1     | 1    | K.FGVSAAPVMVAGAAVAGAAGGAAEEK.T + Oxidation (M) |
| 759.4369  | 2275.2889 | 2275.2198 | 0.0691  | 0    | (68)  | 0.0017  | 1    | K.EDVLEFISNLSVLELSELVK.E                       |
| 1138.6845 | 2275.3544 | 2275.2198 | 0.1346  | 0    | 100   | 1.1e-06 | 1    | K.EDVLEFISNLSVLELSELVK.E                       |
| 897.2275  | 2688.6607 | 2688.4836 | 0.1771  | 1    | 69    | 0.0011  | 1    | M.AITKEDVLEFISNLSVLELSELVK.E                   |
| 673.1947  | 2688.7498 | 2688.4836 | 0.2662  | 1    | (45)  | 0.29    | 1    | M.AITKEDVLEFISNLSVLELSELVK.E                   |
| 709.9470  | 2835.7587 | 2835.5190 | 0.2397  | 1    | 69    | 0.001   | 1    | -.MAITKEDVLEFISNLSVLELSELVK.E + Oxidation (M)  |
| 980.2579  | 2937.7518 | 2937.5109 | 0.2408  | 1    | 98    | 1.6e-06 | 1    | K.EDVLEFISNLSVLELSELVKEFEK.F                   |

---

## *Campylobacter concisus* RM3806 Protein Biomarkers

Mascot-RM3806\_try\_p\_hplc#64\_gel#9\_041016

[gi|109673896](#) Mass: 10608 Score: 745 Queries matched: 47

Hypothetical protein Ccur5\_01001212 [*Campylobacter curvus* 525.92]

1 MKKAEFIQAVADKAGLSKKDSLKVVDTLETIQAVLEKSDSI[**S**]FIGFGTF

51 [S]TADRAARKARVPGTKKVIDVPASKAVKFKVGGKLLKEAVAAGAH[**H**]KKGKKK

| Observed | Mr(expt)  | Mr(calc)  | Delta  | Miss | Score | Expect  | Rank | Peptide                           |
|----------|-----------|-----------|--------|------|-------|---------|------|-----------------------------------|
| 414.7603 | 827.5060  | 827.4752  | 0.0307 | 0    | (23)  | 55      | 5    | K.VIDVPASK.A                      |
| 414.7603 | 827.5060  | 827.4752  | 0.0307 | 0    | (24)  | 48      | 10   | K.VIDVPASK.A                      |
| 414.7693 | 827.5241  | 827.4752  | 0.0489 | 0    | 48    | 0.19    | 1    | K.VIDVPASK.A                      |
| 414.7693 | 827.5241  | 827.4752  | 0.0489 | 0    | (34)  | 4.4     | 1    | K.VIDVPASK.A                      |
| 428.8009 | 855.5873  | 855.5290  | 0.0583 | 2    | 17    | 2.4e+02 | 4    | K.ARVPGTKK.V                      |
| 478.8219 | 955.6293  | 955.5702  | 0.0591 | 1    | 63    | 0.0051  | 1    | K.KVIDVPASK.A                     |
| 546.3140 | 1090.6135 | 1090.5658 | 0.0477 | 0    | 65    | 0.0034  | 1    | K.AEFIQAVADK.A                    |
| 546.3140 | 1090.6135 | 1090.5658 | 0.0477 | 0    | (22)  | 75      | 1    | K.AEFIQAVADK.A                    |
| 546.3140 | 1090.6135 | 1090.5658 | 0.0477 | 0    | (57)  | 0.024   | 1    | K.AEFIQAVADK.A                    |
| 546.3140 | 1090.6135 | 1090.5658 | 0.0477 | 0    | (51)  | 0.097   | 1    | K.AEFIQAVADK.A                    |
| 546.3140 | 1090.6135 | 1090.5658 | 0.0477 | 0    | (56)  | 0.029   | 1    | K.AEFIQAVADK.A                    |
| 546.3140 | 1090.6135 | 1090.5658 | 0.0477 | 0    | (39)  | 1.4     | 1    | K.AEFIQAVADK.A                    |
| 546.3140 | 1090.6135 | 1090.5658 | 0.0477 | 0    | (61)  | 0.0091  | 1    | K.AEFIQAVADK.A                    |
| 546.3140 | 1090.6135 | 1090.5658 | 0.0477 | 0    | (63)  | 0.0053  | 1    | K.AEFIQAVADK.A                    |
| 546.3245 | 1090.6344 | 1090.5658 | 0.0685 | 0    | (44)  | 0.49    | 1    | K.AEFIQAVADK.A                    |
| 546.3245 | 1090.6344 | 1090.5658 | 0.0685 | 0    | (55)  | 0.033   | 1    | K.AEFIQAVADK.A                    |
| 546.3245 | 1090.6344 | 1090.5658 | 0.0685 | 0    | (58)  | 0.016   | 1    | K.AEFIQAVADK.A                    |
| 546.3245 | 1090.6344 | 1090.5658 | 0.0685 | 0    | (57)  | 0.022   | 1    | K.AEFIQAVADK.A                    |
| 546.8145 | 1091.6145 | 1090.5658 | 1.0486 | 0    | (50)  | 0.096   | 1    | K.AEFIQAVADK.A                    |
| 407.2469 | 1218.7188 | 1218.6608 | 0.0580 | 1    | (59)  | 0.016   | 1    | K.KAEFIQAVADK.A                   |
| 610.3731 | 1218.7317 | 1218.6608 | 0.0709 | 1    | 90    | 1.2e-05 | 1    | K.KAEFIQAVADK.A                   |
| 498.9571 | 1493.8494 | 1493.7911 | 0.0583 | 2    | (64)  | 0.0044  | 1    | -.MKKAEFIQAVADK.A + Oxidation (M) |
| 747.9468 | 1493.8790 | 1493.7911 | 0.0879 | 2    | 82    | 6.3e-05 | 1    | -.MKKAEFIQAVADK.A + Oxidation (M) |
| 774.4622 | 1546.9098 | 1546.8354 | 0.0744 | 1    | 77    | 0.00024 | 1    | K.AEFIQAVADKAGLSK.K               |
| 516.6443 | 1546.9110 | 1546.8354 | 0.0756 | 1    | (53)  | 0.058   | 1    | K.AEFIQAVADKAGLSK.K               |
| 543.6591 | 1627.9555 | 1627.9032 | 0.0523 | 0    | (23)  | 54      | 1    | K.VVDTLETIQAVLEK.S                |
| 543.6591 | 1627.9555 | 1627.9032 | 0.0523 | 0    | (40)  | 1.1     | 1    | K.VVDTLETIQAVLEK.S                |
| 543.6591 | 1627.9555 | 1627.9032 | 0.0523 | 0    | (23)  | 54      | 2    | K.VVDTLETIQAVLEK.S                |

|          |           |           |        |   |       |         |   |                                        |
|----------|-----------|-----------|--------|---|-------|---------|---|----------------------------------------|
| 543.6591 | 1627.9555 | 1627.9032 | 0.0523 | 0 | (20)  | 1.1e+02 | 2 | K.VVDATLETIQAVLEK.S                    |
| 543.6591 | 1627.9555 | 1627.9032 | 0.0523 | 0 | (39)  | 1.6     | 1 | K.VVDATLETIQAVLEK.S                    |
| 543.6591 | 1627.9555 | 1627.9032 | 0.0523 | 0 | (27)  | 21      | 1 | K.VVDATLETIQAVLEK.S                    |
| 814.9930 | 1627.9714 | 1627.9032 | 0.0683 | 0 | 111   | 9.2e-08 | 1 | K.VVDATLETIQAVLEK.S                    |
| 814.9930 | 1627.9714 | 1627.9032 | 0.0683 | 0 | (96)  | 2.7e-06 | 1 | K.VVDATLETIQAVLEK.S                    |
| 814.9930 | 1627.9714 | 1627.9032 | 0.0683 | 0 | (97)  | 2.2e-06 | 1 | K.VVDATLETIQAVLEK.S                    |
| 814.9930 | 1627.9714 | 1627.9032 | 0.0683 | 0 | (100) | 1.1e-06 | 1 | K.VVDATLETIQAVLEK.S                    |
| 814.9930 | 1627.9714 | 1627.9032 | 0.0683 | 0 | (103) | 5.6e-07 | 1 | K.VVDATLETIQAVLEK.S                    |
| 814.9930 | 1627.9714 | 1627.9032 | 0.0683 | 0 | (103) | 5.4e-07 | 1 | K.VVDATLETIQAVLEK.S                    |
| 814.9930 | 1627.9714 | 1627.9032 | 0.0683 | 0 | (106) | 2.7e-07 | 1 | K.VVDATLETIQAVLEK.S                    |
| 814.9930 | 1627.9714 | 1627.9032 | 0.0683 | 0 | (92)  | 6.8e-06 | 1 | K.VVDATLETIQAVLEK.S                    |
| 814.9930 | 1627.9714 | 1627.9032 | 0.0683 | 0 | (90)  | 1.2e-05 | 1 | K.VVDATLETIQAVLEK.S                    |
| 543.6695 | 1627.9867 | 1627.9032 | 0.0835 | 0 | (69)  | 0.0016  | 1 | K.VVDATLETIQAVLEK.S                    |
| 543.6695 | 1627.9867 | 1627.9032 | 0.0835 | 0 | (68)  | 0.0016  | 1 | K.VVDATLETIQAVLEK.S                    |
| 543.6695 | 1627.9867 | 1627.9032 | 0.0835 | 0 | (20)  | 1e+02   | 3 | K.VVDATLETIQAVLEK.S                    |
| 543.6695 | 1627.9867 | 1627.9032 | 0.0835 | 0 | (38)  | 2       | 1 | K.VVDATLETIQAVLEK.S                    |
| 559.3480 | 1675.0222 | 1674.9304 | 0.0918 | 2 | 46    | 0.29    | 1 | K.KAEFIQAVADKAGLSK.K                   |
| 838.5235 | 1675.0324 | 1674.9304 | 0.1020 | 2 | 64    | 0.0043  | 1 | K.AEFIQAVADKAGLSK.K                    |
| 651.0589 | 1950.1548 | 1950.0607 | 0.0941 | 3 | 88    | 1.5e-05 | 1 | -.MKKAEFIQAVADKAGLSK.K + Oxidation (M) |

Confirmation of composite, *de novo*  
and point mutation sequence by GPM analysis

\*\*\*\*\*

log(e) = -179.1

RM3806\_HU\_[HUP\_from\_Ccurvus\_Cconcisus\_composite\_denovo\_ESLK]

1 MKKAEFIQAVADKAGLSKESLKVVDATLETIQAVLEKKGSISFIFGFTFGTADRRAARKA 60  
 61 RVPGTKKVIDVPASKAVKFKVGGKLLKEAVAAGAAKKGKKK 100

| spectrum | log(e) | log(I) | m+h      | delta  | z | sequence                                             |
|----------|--------|--------|----------|--------|---|------------------------------------------------------|
| 84.1     | -7.0   | 3.70   | 1951.074 | 0.086  | 3 | [ <sup>1</sup> MKKAEFIQAVADKAGLSK <sup>18</sup> kesl |
| 53.1     | -6.3   | 3.83   | 1494.805 | 0.065  | 2 | [ <sup>1</sup> MKKAEFIQAVADK <sup>13</sup> agls      |
| 52.1     | -1.5   | 4.04   | 1494.805 | 0.055  | 3 | [ <sup>1</sup> MKKAEFIQAVADK <sup>13</sup> agls      |
| 92.1     | -5.3   | 4.05   | 1676.939 | -0.929 | 3 | [mk <sup>3</sup> KAEFIQAVADKAGLSK <sup>18</sup> kesl |
| 59.1     | -3.4   | 3.92   | 1219.669 | 0.061  | 2 | [mk <sup>3</sup> KAEFIQAVADK <sup>13</sup> agls      |
| 62.1     | -1.9   | 4.67   | 1219.669 | 0.051  | 3 | [mk <sup>3</sup> KAEFIQAVADK <sup>13</sup> agls      |
| 93.1     | -2.9   | 2.91   | 1675.939 | 0.081  | 2 | [mkk <sup>4</sup> AEFIQAVADKAGLSK <sup>19</sup> eslk |
| 98.1     | -3.6   | 4.51   | 1547.844 | 0.066  | 3 | [mkk <sup>4</sup> AEFIQAVADKAGLSK <sup>18</sup> kesl |
| 99.1     | -3.2   | 3.79   | 1547.844 | 0.066  | 2 | [mkk <sup>4</sup> AEFIQAVADKAGLSK <sup>18</sup> kesl |
| 219.1    | -2.0   | 3.40   | 1091.574 | 0.046  | 2 | [mkk <sup>4</sup> AEFIQAVADK <sup>13</sup> agls      |
| 65.1     | -1.6   | 4.92   | 1091.574 | 0.046  | 2 | [mkk <sup>4</sup> AEFIQAVADK <sup>13</sup> agls      |

|       |      |      |          |        |   |                                                                             |
|-------|------|------|----------|--------|---|-----------------------------------------------------------------------------|
| 263.1 | -1.6 | 3.88 | 1091.574 | 0.176  | 2 | [mkk <sup>4</sup> AEFIQAVADK <sup>13</sup> agls                             |
| 119.1 | -1.5 | 3.63 | 1091.574 | 0.046  | 2 | [mkk <sup>4</sup> AEFIQAVADK <sup>13</sup> agls                             |
| 243.1 | -1.4 | 3.51 | 1091.574 | 0.046  | 2 | [mkk <sup>4</sup> AEFIQAVADK <sup>13</sup> agls                             |
| 257.1 | -1.3 | 3.50 | 1091.574 | 0.066  | 2 | [mkk <sup>4</sup> AEFIQAVADK <sup>13</sup> agls                             |
| 95.1  | -1.3 | 3.80 | 1091.574 | 0.046  | 2 | [mkk <sup>4</sup> AEFIQAVADK <sup>13</sup> agls                             |
| 195.1 | -1.2 | 3.37 | 1091.574 | 0.046  | 2 | [mkk <sup>4</sup> AEFIQAVADK <sup>13</sup> agls                             |
| 238.1 | -3.8 | 3.24 | 3828.044 | 1.156  | 3 | lskk <sup>20</sup> ESLKVV DATLETIQAVLEKKG SISFIGFTFGTADR <sup>55</sup> aark |
| 208.1 | -3.1 | 3.97 | 2086.166 | 0.084  | 3 | lskk <sup>20</sup> ESLKVV DATLETIQAVLEK <sup>38</sup> kgsi                  |
| 212.1 | -3.1 | 3.13 | 2128.165 | -0.875 | 3 | lskk <sup>20</sup> ESLKVV DATLETIQAVLEK <sup>38</sup> kgsi                  |
| 192.1 | -2.4 | 3.95 | 3370.790 | 1.090  | 3 | eslk <sup>24</sup> VVDATLETIQAVLEKKG SISFIGFTFGTADR <sup>55</sup> aark      |
| 222.1 | -2.1 | 2.97 | 3370.790 | 2.100  | 3 | eslk <sup>24</sup> VVDATLETIQAVLEKKG SISFIGFTFGTADR <sup>55</sup> aark      |
| 128.1 | -3.7 | 3.56 | 1757.006 | 0.063  | 3 | eslk <sup>24</sup> VVDATLETIQAVLEK <sup>39</sup> gsgis                      |
| 279.1 | -5.5 | 2.98 | 1628.911 | 0.058  | 2 | eslk <sup>24</sup> VVDATLETIQAVLEK <sup>38</sup> kgsi                       |
| 185.1 | -5.3 | 3.40 | 1628.911 | 0.058  | 2 | eslk <sup>24</sup> VVDATLETIQAVLEK <sup>38</sup> kgsi                       |
| 137.1 | -5.0 | 5.18 | 1628.911 | 0.058  | 2 | eslk <sup>24</sup> VVDATLETIQAVLEK <sup>38</sup> kgsi                       |
| 161.1 | -4.8 | 3.95 | 1628.911 | 0.058  | 2 | eslk <sup>24</sup> VVDATLETIQAVLEK <sup>38</sup> kgsi                       |
| 291.1 | -4.8 | 2.93 | 1628.911 | 0.058  | 2 | eslk <sup>24</sup> VVDATLETIQAVLEK <sup>38</sup> kgsi                       |
| 253.1 | -4.6 | 3.19 | 1628.911 | 0.068  | 2 | eslk <sup>24</sup> VVDATLETIQAVLEK <sup>38</sup> kgsi                       |
| 209.1 | -4.5 | 3.30 | 1628.911 | 0.068  | 2 | eslk <sup>24</sup> VVDATLETIQAVLEK <sup>38</sup> kgsi                       |
| 267.1 | -4.0 | 3.01 | 1628.911 | 0.058  | 2 | eslk <sup>24</sup> VVDATLETIQAVLEK <sup>38</sup> kgsi                       |
| 233.1 | -3.9 | 3.32 | 1628.911 | 0.068  | 2 | eslk <sup>24</sup> VVDATLETIQAVLEK <sup>38</sup> kgsi                       |
| 206.1 | -3.1 | 3.68 | 1628.911 | 0.068  | 3 | eslk <sup>24</sup> VVDATLETIQAVLEK <sup>38</sup> kgsi                       |
| 136.1 | -3.0 | 4.73 | 1628.911 | 0.058  | 3 | eslk <sup>24</sup> VVDATLETIQAVLEK <sup>38</sup> kgsi                       |
| 184.1 | -2.9 | 3.55 | 1628.911 | 0.068  | 3 | eslk <sup>24</sup> VVDATLETIQAVLEK <sup>38</sup> kgsi                       |
| 160.1 | -2.7 | 4.24 | 1628.911 | 0.058  | 3 | eslk <sup>24</sup> VVDATLETIQAVLEK <sup>38</sup> kgsi                       |
| 232.1 | -1.6 | 3.67 | 1628.911 | 0.048  | 3 | eslk <sup>24</sup> VVDATLETIQAVLEK <sup>38</sup> kgsi                       |
| 304.1 | -1.5 | 3.35 | 1628.911 | 0.058  | 3 | eslk <sup>24</sup> VVDATLETIQAVLEK <sup>38</sup> kgsi                       |
| 115.1 | -5.0 | 3.59 | 1315.748 | 0.062  | 2 | kvvd <sup>27</sup> ATLETIQAVLEK <sup>38</sup> kgsi                          |
| 246.1 | -2.9 | 3.90 | 2643.415 | -1.005 | 3 | atle <sup>31</sup> TIQAVLEKKG SISFIGFTFGTADR <sup>55</sup> aark             |
| 274.1 | -2.9 | 3.48 | 2643.415 | -0.985 | 3 | atle <sup>31</sup> TIQAVLEKKG SISFIGFTFGTADR <sup>55</sup> aark             |
| 132.1 | -2.8 | 4.62 | 2643.415 | -1.035 | 3 | atle <sup>31</sup> TIQAVLEKKG SISFIGFTFGTADR <sup>55</sup> aark             |
| 156.1 | -2.5 | 4.48 | 2643.415 | -1.045 | 3 | atle <sup>31</sup> TIQAVLEKKG SISFIGFTFGTADR <sup>55</sup> aark             |
| 300.1 | -2.5 | 3.21 | 2643.415 | -1.025 | 3 | atle <sup>31</sup> TIQAVLEKKG SISFIGFTFGTADR <sup>55</sup> aark             |
| 202.1 | -2.1 | 4.17 | 2643.415 | -1.045 | 3 | atle <sup>31</sup> TIQAVLEKKG SISFIGFTFGTADR <sup>55</sup> aark             |
| 180.1 | -2.1 | 4.38 | 2643.415 | -1.045 | 3 | atle <sup>31</sup> TIQAVLEKKG SISFIGFTFGTADR <sup>55</sup> aark             |
| 262.1 | -2.0 | 3.78 | 2643.415 | -1.045 | 3 | atle <sup>31</sup> TIQAVLEKKG SISFIGFTFGTADR <sup>55</sup> aark             |
| 226.1 | -1.7 | 4.08 | 2643.415 | -1.065 | 3 | atle <sup>31</sup> TIQAVLEKKG SISFIGFTFGTADR <sup>55</sup> aark             |
| 155.1 | -6.7 | 4.48 | 1760.898 | 1.012  | 2 | vlek <sup>39</sup> KG SISFIGFTFGTADR <sup>55</sup> aark                     |
| 201.1 | -6.6 | 4.17 | 1760.898 | 1.012  | 2 | vlek <sup>39</sup> KG SISFIGFTFGTADR <sup>55</sup> aark                     |
| 179.1 | -6.2 | 4.38 | 1760.898 | 1.012  | 2 | vlek <sup>39</sup> KG SISFIGFTFGTADR <sup>55</sup> aark                     |
| 261.1 | -6.1 | 3.78 | 1760.898 | 1.012  | 2 | vlek <sup>39</sup> KG SISFIGFTFGTADR <sup>55</sup> aark                     |



|       |      |      |          |        |   |                                                            |
|-------|------|------|----------|--------|---|------------------------------------------------------------|
| 225.1 | -5.9 | 4.08 | 1760.898 | 1.012  | 2 | vlek <sup>39</sup> KGSISFIGFGTFTADR <sup>55</sup> aark     |
| 245.1 | -5.7 | 3.90 | 1760.898 | 1.042  | 2 | vlek <sup>39</sup> KGSISFIGFGTFTADR <sup>55</sup> aark     |
| 131.1 | -5.6 | 4.62 | 1760.898 | 1.022  | 2 | vlek <sup>39</sup> KGSISFIGFGTFTADR <sup>55</sup> aark     |
| 299.1 | -5.5 | 3.21 | 1760.898 | 1.032  | 2 | vlek <sup>39</sup> KGSISFIGFGTFTADR <sup>55</sup> aark     |
| 273.1 | -5.0 | 3.48 | 1760.898 | 1.052  | 2 | vlek <sup>39</sup> KGSISFIGFGTFTADR <sup>55</sup> aark     |
| 305.1 | -4.0 | 2.69 | 1760.898 | 1.022  | 2 | vlek <sup>39</sup> KGSISFIGFGTFTADR <sup>55</sup> aark     |
| 285.1 | -3.6 | 3.31 | 1760.898 | 1.052  | 2 | vlek <sup>39</sup> KGSISFIGFGTFTADR <sup>55</sup> aark     |
| 134.1 | -2.6 | 4.50 | 1760.898 | 1.012  | 3 | vlek <sup>39</sup> KGSISFIGFGTFTADR <sup>55</sup> aark     |
| 204.1 | -1.6 | 3.63 | 1760.898 | 1.012  | 3 | vlek <sup>39</sup> KGSISFIGFGTFTADR <sup>55</sup> aark     |
| 158.1 | -1.4 | 3.99 | 1760.898 | 1.012  | 3 | vlek <sup>39</sup> KGSISFIGFGTFTADR <sup>55</sup> aark     |
| 182.1 | -1.4 | 3.52 | 1760.898 | 1.022  | 3 | vlek <sup>39</sup> KGSISFIGFGTFTADR <sup>55</sup> aark     |
| 248.1 | -1.4 | 3.41 | 1760.898 | 1.012  | 3 | vlek <sup>39</sup> KGSISFIGFGTFTADR <sup>55</sup> aark     |
| 169.1 | -2.1 | 3.92 | 1260.663 | 0.997  | 2 | vlek <sup>39</sup> KGSISFIGFT <sup>50</sup> gtad           |
| 235.1 | -2.3 | 3.56 | 1530.749 | 1.521  | 2 | kkgs <sup>42</sup> ISFIGFGTFTADR <sup>55</sup> aark        |
| 89.1  | -5.0 | 4.44 | 1141.565 | 0.045  | 2 | sisf <sup>45</sup> IGFGTFTADR <sup>55</sup> aark           |
| 171.1 | -2.7 | 2.73 | 1141.565 | 0.065  | 2 | sisf <sup>45</sup> IGFGTFTADR <sup>55</sup> aark           |
| 165.1 | -2.4 | 3.19 | 1028.481 | 0.069  | 2 | isfi <sup>46</sup> GFGTFTADR <sup>55</sup> aark            |
| 31.1  | -1.3 | 3.71 | 956.579  | 0.048  | 2 | pgtk <sup>67</sup> KVIDVPASK <sup>75</sup> avkf            |
| 80.1  | -4.5 | 3.33 | 2014.255 | 0.095  | 3 | pask <sup>76</sup> AVKFKVGKLLKEAVAAGAAK <sup>95</sup> kgkk |
| 76.1  | -1.1 | 3.34 | 1716.054 | 0.186  | 3 | kavk <sup>79</sup> FKVGKLLKEAVAAGAAK <sup>95</sup> kgkk    |
| 79.1  | -2.0 | 3.31 | 1341.822 | 1.408  | 2 | kfkv <sup>82</sup> GKLLKEAVAAGAAK <sup>95</sup> kgkk       |
| 15.1  | -3.6 | 3.15 | 1156.706 | -0.916 | 2 | kvgk <sup>84</sup> KLKEAVAAGAAK <sup>95</sup> kgkk         |
| 5.1   | -2.7 | 2.75 | 1156.706 | 0.064  | 2 | vgkk <sup>85</sup> LKEAVAAGAAK <sup>96</sup> gkkk]         |
| 3.1   | -2.0 | 3.43 | 1028.611 | 0.079  | 2 | vgkk <sup>85</sup> LKEAVAAGAAK <sup>95</sup> kgkk          |
| 25.1  | -1.8 | 2.65 | 1028.611 | 0.049  | 2 | vgkk <sup>85</sup> LKEAVAAGAAK <sup>95</sup> kgkk          |

\*\*\*\*\*

Mascot-RM3806\_tryp\_hplc#64\_gel#9\_041016

gi|109671087 Mass: 6013 Score: 347 Queries matched: 10

Hypothetical protein Ccon1\_01002013 [*Campylobacter concisus* 13826]

1 SFIGFGTFTG TADRAARKARVPGTKKVIDVPASKAVKFKVGKLLKEAVAAG  
 51 AAKKGKKK

| Observed | Mr(expt) | Mr(calc) | Delta  | Miss | Score | Expect  | Rank | Peptide      |
|----------|----------|----------|--------|------|-------|---------|------|--------------|
| 414.7603 | 827.5060 | 827.4752 | 0.0307 | 0    | (23)  | 55      | 5    | K.VIDVPASK.A |
| 414.7603 | 827.5060 | 827.4752 | 0.0307 | 0    | (24)  | 48      | 10   | K.VIDVPASK.A |
| 414.7693 | 827.5241 | 827.4752 | 0.0489 | 0    | 48    | 0.19    | 1    | K.VIDVPASK.A |
| 414.7693 | 827.5241 | 827.4752 | 0.0489 | 0    | (34)  | 4.4     | 1    | K.VIDVPASK.A |
| 428.8009 | 855.5873 | 855.5290 | 0.0583 | 2    | 17    | 2.4e+02 | 4    | K.ARVPGTKK.V |



|          |           |           |        |   |      |         |   |                          |
|----------|-----------|-----------|--------|---|------|---------|---|--------------------------|
| 478.8219 | 955.6293  | 955.5702  | 0.0591 | 1 | 63   | 0.0051  | 1 | K.KVIDVPASK.A            |
| 514.8415 | 1027.6684 | 1027.6025 | 0.0659 | 1 | (50) | 0.13    | 2 | K.LKEAVAAGAAK.K          |
| 514.8516 | 1027.6886 | 1027.6025 | 0.0861 | 1 | 87   | 2.1e-05 | 1 | K.LKEAVAAGAAK.K          |
| 578.8919 | 1155.7693 | 1155.6975 | 0.0718 | 2 | 55   | 0.037   | 1 | K.KLKEAVAAGAAK.K         |
| 672.1194 | 2013.3365 | 2013.2461 | 0.0904 | 5 | 81   | 6.6e-05 | 1 | K.AVKFKVGKLLKEAVAAGAAK.K |

Mascot-RM3806\_tryplc#64\_gel#1\_041016

gi|109673896 Mass: 10608 Score: 719 Queries matched: 59

hypothetical protein Ccur5\_01001212 [*Campylobacter curvus* 525.92]

1 MKKAEFIQAVADKAGLSKKDSLKVVDATLETIQAVLEKSDSISFIGFGTF

51 STADRAARKARVPGTKKVIDVPASKAVKFKVGKLLKEAVAAGAHKKGKKK

| Observed | Mr(expt)  | Mr(calc)  | Delta  | MissScore | Expect | Rank    | Peptide           |
|----------|-----------|-----------|--------|-----------|--------|---------|-------------------|
| 414.7603 | 827.5060  | 827.4752  | 0.0307 | 0         | (23)   | 62      | 3 K.VIDVPASK.A    |
| 414.7693 | 827.5241  | 827.4752  | 0.0489 | 0         | 46     | 0.3     | 1 K.VIDVPASK.A    |
| 414.7693 | 827.5241  | 827.4752  | 0.0489 | 0         | (27)   | 22      | 4 K.VIDVPASK.A    |
| 478.8122 | 955.6098  | 955.5702  | 0.0396 | 1         | (13)   | 6e+02   | 9 K.KVIDVPASK.A   |
| 478.8122 | 955.6098  | 955.5702  | 0.0396 | 1         | (31)   | 8.6     | 1 K.KVIDVPASK.A   |
| 478.8122 | 955.6098  | 955.5702  | 0.0396 | 1         | 33     | 5       | 1 K.KVIDVPASK.A   |
| 478.8219 | 955.6293  | 955.5702  | 0.0591 | 1         | (16)   | 2.7e+02 | 1 K.KVIDVPASK.A   |
| 478.8219 | 955.6293  | 955.5702  | 0.0591 | 1         | (22)   | 72      | 10 K.KVIDVPASK.A  |
| 546.3140 | 1090.6135 | 1090.5658 | 0.0477 | 0         | 72     | 0.00072 | 1 K.AEFIQAVADK.A  |
| 546.3140 | 1090.6135 | 1090.5658 | 0.0477 | 0         | (32)   | 6.7     | 1 K.AEFIQAVADK.A  |
| 546.3140 | 1090.6135 | 1090.5658 | 0.0477 | 0         | (59)   | 0.013   | 1 K.AEFIQAVADK.A  |
| 546.3140 | 1090.6135 | 1090.5658 | 0.0477 | 0         | (46)   | 0.26    | 1 K.AEFIQAVADK.A  |
| 546.3140 | 1090.6135 | 1090.5658 | 0.0477 | 0         | (56)   | 0.027   | 1 K.AEFIQAVADK.A  |
| 546.3140 | 1090.6135 | 1090.5658 | 0.0477 | 0         | (49)   | 0.13    | 1 K.AEFIQAVADK.A  |
| 546.3140 | 1090.6135 | 1090.5658 | 0.0477 | 0         | (56)   | 0.03    | 1 K.AEFIQAVADK.A  |
| 546.3140 | 1090.6135 | 1090.5658 | 0.0477 | 0         | (58)   | 0.017   | 1 K.AEFIQAVADK.A  |
| 546.3140 | 1090.6135 | 1090.5658 | 0.0477 | 0         | (62)   | 0.0065  | 1 K.AEFIQAVADK.A  |
| 546.3140 | 1090.6135 | 1090.5658 | 0.0477 | 0         | (53)   | 0.06    | 1 K.AEFIQAVADK.A  |
| 546.3140 | 1090.6135 | 1090.5658 | 0.0477 | 0         | (54)   | 0.047   | 1 K.AEFIQAVADK.A  |
| 546.3140 | 1090.6135 | 1090.5658 | 0.0477 | 0         | (56)   | 0.03    | 1 K.AEFIQAVADK.A  |
| 546.3245 | 1090.6344 | 1090.5658 | 0.0685 | 0         | (53)   | 0.057   | 1 K.AEFIQAVADK.A  |
| 546.3245 | 1090.6344 | 1090.5658 | 0.0685 | 0         | (54)   | 0.049   | 1 K.AEFIQAVADK.A  |
| 610.3621 | 1218.7097 | 1218.6608 | 0.0489 | 1         | 89     | 1.3e-05 | 1 K.KAEFIQAVADK.A |
| 610.3621 | 1218.7097 | 1218.6608 | 0.0489 | 1         | (67)   | 0.0023  | 1 K.KAEFIQAVADK.A |

|          |           |           |        |   |       |         |   |                                        |
|----------|-----------|-----------|--------|---|-------|---------|---|----------------------------------------|
| 610.3621 | 1218.7097 | 1218.6608 | 0.0489 | 1 | (68)  | 0.0018  | 1 | K.KAEFIQAVADK.A                        |
| 610.3621 | 1218.7097 | 1218.6608 | 0.0489 | 1 | (59)  | 0.016   | 1 | K.KAEFIQAVADK.A                        |
| 407.2469 | 1218.7188 | 1218.6608 | 0.0580 | 1 | (49)  | 0.15    | 1 | K.KAEFIQAVADK.A                        |
| 610.3731 | 1218.7317 | 1218.6608 | 0.0709 | 1 | (85)  | 3.6e-05 | 1 | K.KAEFIQAVADK.A                        |
| 610.3731 | 1218.7317 | 1218.6608 | 0.0709 | 1 | (57)  | 0.025   | 1 | K.KAEFIQAVADK.A                        |
| 610.3731 | 1218.7317 | 1218.6608 | 0.0709 | 1 | (35)  | 3.3     | 1 | K.KAEFIQAVADK.A                        |
| 498.9571 | 1493.8494 | 1493.7911 | 0.0583 | 2 | (82)  | 6.6e-05 | 1 | -.MKKAEFIQAVADK.A + Oxidation (M)      |
| 747.9468 | 1493.8790 | 1493.7911 | 0.0879 | 2 | 85    | 3.4e-05 | 1 | -.MKKAEFIQAVADK.A + Oxidation (M)      |
| 774.4622 | 1546.9098 | 1546.8354 | 0.0744 | 1 | 75    | 0.00039 | 1 | K.AEFIQAVADKAGLSK.K                    |
| 516.6443 | 1546.9110 | 1546.8354 | 0.0756 | 1 | (48)  | 0.2     | 1 | K.AEFIQAVADKAGLSK.K                    |
| 814.9803 | 1627.9460 | 1627.9032 | 0.0428 | 0 | 111   | 9.1e-08 | 1 | K.VVDATLETIQAVLEK.S                    |
| 543.6591 | 1627.9555 | 1627.9032 | 0.0523 | 0 | (92)  | 6.7e-06 | 1 | K.VVDATLETIQAVLEK.S                    |
| 814.9930 | 1627.9714 | 1627.9032 | 0.0683 | 0 | (93)  | 6.4e-06 | 1 | K.VVDATLETIQAVLEK.S                    |
| 814.9930 | 1627.9714 | 1627.9032 | 0.0683 | 0 | (98)  | 1.7e-06 | 1 | K.VVDATLETIQAVLEK.S                    |
| 814.9930 | 1627.9714 | 1627.9032 | 0.0683 | 0 | (103) | 5.3e-07 | 1 | K.VVDATLETIQAVLEK.S                    |
| 814.9930 | 1627.9714 | 1627.9032 | 0.0683 | 0 | (98)  | 1.8e-06 | 1 | K.VVDATLETIQAVLEK.S                    |
| 814.9930 | 1627.9714 | 1627.9032 | 0.0683 | 0 | (103) | 5.9e-07 | 1 | K.VVDATLETIQAVLEK.S                    |
| 814.9930 | 1627.9714 | 1627.9032 | 0.0683 | 0 | (101) | 9.2e-07 | 1 | K.VVDATLETIQAVLEK.S                    |
| 543.6695 | 1627.9867 | 1627.9032 | 0.0835 | 0 | (63)  | 0.0051  | 1 | K.VVDATLETIQAVLEK.S                    |
| 543.6695 | 1627.9867 | 1627.9032 | 0.0835 | 0 | (61)  | 0.0097  | 1 | K.VVDATLETIQAVLEK.S                    |
| 543.6695 | 1627.9867 | 1627.9032 | 0.0835 | 0 | (44)  | 0.41    | 1 | K.VVDATLETIQAVLEK.S                    |
| 543.6695 | 1627.9867 | 1627.9032 | 0.0835 | 0 | (35)  | 3.3     | 1 | K.VVDATLETIQAVLEK.S                    |
| 543.6695 | 1627.9867 | 1627.9032 | 0.0835 | 0 | (24)  | 47      | 1 | K.VVDATLETIQAVLEK.S                    |
| 543.6695 | 1627.9867 | 1627.9032 | 0.0835 | 0 | (26)  | 29      | 1 | K.VVDATLETIQAVLEK.S                    |
| 543.6695 | 1627.9867 | 1627.9032 | 0.0835 | 0 | (36)  | 2.5     | 1 | K.VVDATLETIQAVLEK.S                    |
| 543.6695 | 1627.9867 | 1627.9032 | 0.0835 | 0 | (31)  | 8.2     | 1 | K.VVDATLETIQAVLEK.S                    |
| 543.6695 | 1627.9867 | 1627.9032 | 0.0835 | 0 | (32)  | 6.5     | 1 | K.VVDATLETIQAVLEK.S                    |
| 815.0057 | 1627.9969 | 1627.9032 | 0.0937 | 0 | (89)  | 1.3e-05 | 1 | K.VVDATLETIQAVLEK.S                    |
| 815.0057 | 1627.9969 | 1627.9032 | 0.0937 | 0 | (97)  | 2e-06   | 1 | K.VVDATLETIQAVLEK.S                    |
| 543.6799 | 1628.0179 | 1627.9032 | 0.1147 | 0 | (24)  | 43      | 1 | K.VVDATLETIQAVLEK.S                    |
| 815.0185 | 1628.0224 | 1627.9032 | 0.1192 | 0 | (97)  | 1.9e-06 | 1 | K.VVDATLETIQAVLEK.S                    |
| 815.0185 | 1628.0224 | 1627.9032 | 0.1192 | 0 | (95)  | 3.2e-06 | 1 | K.VVDATLETIQAVLEK.S                    |
| 559.3374 | 1674.9905 | 1674.9304 | 0.0601 | 2 | 54    | 0.045   | 1 | K.KAEFIQAVADKAGLSK.K                   |
| 838.5106 | 1675.0066 | 1674.9304 | 0.0762 | 2 | 84    | 4.3e-05 | 1 | K.AEFIQAVADKAGLSK.D                    |
| 651.0589 | 1950.1548 | 1950.0607 | 0.0941 | 3 | 74    | 0.00046 | 1 | -.MKKAEFIQAVADKAGLSK.K + Oxidation (M) |

Mascot-RM3806\_tryp\_hplc#64\_gel#1\_041016

gi|109671087 Mass: 6013 Score: 267 Queries matched: 12

hypothetical protein Ccon1\_01002013 [*Campylobacter concisus* 13826]

1 SFIGFGTGTADRAARKARVPGTK**KVIDVPASK**AVKFKVGGK**LKEAVAAG**

51 **AAKKGKKK**

| Observed | Mr(expt)  | Mr(calc)  | Delta  | MissScore | Expect | Rank    | Peptide            |
|----------|-----------|-----------|--------|-----------|--------|---------|--------------------|
| 414.7603 | 827.5060  | 827.4752  | 0.0307 | 0         | (23)   | 62      | 3 K.VIDVPASK.A     |
| 414.7693 | 827.5241  | 827.4752  | 0.0489 | 0         | 46     | 0.3     | 1 K.VIDVPASK.A     |
| 414.7693 | 827.5241  | 827.4752  | 0.0489 | 0         | (27)   | 22      | 4 K.VIDVPASK.A     |
| 458.3087 | 914.6028  | 914.5185  | 0.0843 | 1         | 29     | 17      | 4 K.EAVAAGAAKK.G   |
| 478.8122 | 955.6098  | 955.5702  | 0.0396 | 1         | (13)   | 6e+02   | 9 K.KVIDVPASK.A    |
| 478.8122 | 955.6098  | 955.5702  | 0.0396 | 1         | (31)   | 8.6     | 1 K.KVIDVPASK.A    |
| 478.8122 | 955.6098  | 955.5702  | 0.0396 | 1         | 33     | 5       | 1 K.KVIDVPASK.A    |
| 478.8219 | 955.6293  | 955.5702  | 0.0591 | 1         | (16)   | 2.7e+02 | 1 K.KVIDVPASK.A    |
| 478.8219 | 955.6293  | 955.5702  | 0.0591 | 1         | (22)   | 72      | 10 K.KVIDVPASK.A   |
| 514.8415 | 1027.6684 | 1027.6025 | 0.0659 | 1         | (60)   | 0.013   | 1 K.LKEAVAAGAAK.K  |
| 514.8516 | 1027.6886 | 1027.6025 | 0.0861 | 1         | 77     | 0.00023 | 1 K.LKEAVAAGAAK.K  |
| 578.8919 | 1155.7693 | 1155.6975 | 0.0718 | 2         | 84     | 4.7e-05 | 1 K.LKEAVAAGAAKK.G |

Mascot-RM3806\_hplc#72\_gs3\_060216

Mass: 13007 Score: 1061 Queries matched: 25

hypothetical protein Ccon1\_01001911 [*Campylobacter concisus* 13826]

1 MAITKEDVLEFISNLSVLELSELVKEFEFEKFGVSAAPVMVAGGAVAAGGA

51 AA~~EE~~KTEFNIVLVDSGDKKINVIKVV**RALTGLGLKEAKDAVEGTPSVLK**

101 **EGVSKDEAEAAKKELEEAGAKVELK**

| Observed | Mr(expt)  | Mr(calc)  | Delta   | MissScore | Expect | Rank  | Peptide           |
|----------|-----------|-----------|---------|-----------|--------|-------|-------------------|
| 293.6949 | 585.3752  | 585.3850  | -0.0098 | 0         | 27     | 21    | 1 K.INVIK.V       |
| 386.7321 | 771.4497  | 771.4854  | -0.0357 | 0         | (49)   | 0.22  | 1 R.ALTGLGLK.E    |
| 386.7497 | 771.4848  | 771.4854  | -0.0006 | 0         | 50     | 0.14  | 1 R.ALTGLGLK.E    |
| 846.3858 | 845.3786  | 845.4130  | -0.0345 | 0         | 44     | 0.62  | 1 K.ELEEAGAK.V    |
| 423.7111 | 845.4077  | 845.4130  | -0.0053 | 0         | (32)   | 9.9   | 1 K.ELEEAGAK.V    |
| 431.2132 | 860.4119  | 860.4239  | -0.0121 | 1         | 46     | 0.32  | 1 K.DEAEAAKK.E    |
| 487.7445 | 973.4745  | 973.5080  | -0.0335 | 1         | 57     | 0.027 | 1 K.KELEEAGAK.V   |
| 558.2710 | 1114.5274 | 1114.5870 | -0.0596 | 0         | 44     | 0.6   | 1 K.DAVEGTPSVLK.E |

|           |           |           |         |   |      |        |   |                                    |
|-----------|-----------|-----------|---------|---|------|--------|---|------------------------------------|
| 617.2822  | 1232.5498 | 1232.5884 | -0.0386 | 1 | 64   | 0.0052 | 1 | K.EGVSKDEAEAAK.K                   |
| 658.3346  | 1314.6546 | 1314.7030 | -0.0485 | 1 | 54   | 0.054  | 5 | K.ELEEAGAKVELK.-                   |
| 681.3155  | 1360.6164 | 1360.6834 | -0.0669 | 2 | 63   | 0.0058 | 1 | K.EGVSKDEAEAAKK.E                  |
| 718.8548  | 1435.6951 | 1435.7194 | -0.0243 | 0 | 64   | 0.0045 | 1 | K.TEFNIVLVDSGDK.K                  |
| 481.9240  | 1442.7501 | 1442.7980 | -0.0479 | 2 | 32   | 8.4    | 1 | K.KELEEAGAKVELK.-                  |
| 522.2700  | 1563.7883 | 1563.8144 | -0.0261 | 1 | 40   | 1.3    | 1 | K.TEFNIVLVDSGDKK.I                 |
| 522.2802  | 1563.8188 | 1563.8144 | 0.0045  | 1 | (25) | 39     | 2 | K.TEFNIVLVDSGDKK.I                 |
| 565.3607  | 1693.0603 | 1693.0977 | -0.0374 | 2 | 58   | 0.018  | 1 | K.INVIKVRALTGLGLK.E                |
| 608.0580  | 1821.1520 | 1821.1927 | -0.0406 | 3 | 29   | 12     | 1 | K.KINVIKVRALTGLGLK.E               |
| 730.3503  | 2188.0290 | 2188.0858 | -0.0568 | 3 | 61   | 0.0096 | 1 | K.EGVSKDEAEAAKKELEEAGAK.V          |
| 759.4018  | 2275.1836 | 2275.2198 | -0.0362 | 0 | 50   | 0.14   | 1 | K.EDVLEFISNLSVLELSELVK.E           |
| 665.3415  | 2657.3369 | 2657.3758 | -0.0389 | 4 | 60   | 0.015  | 1 | K.EGVSKDEAEAAKKELEEAGAKVELK.-      |
| 897.1587  | 2688.4541 | 2688.4836 | -0.0295 | 1 | 65   | 0.0045 | 1 | M.AITKEDVLEFISNLSVLELSELVK.E       |
| 735.3704  | 2937.4526 | 2937.5109 | -0.0583 | 1 | 36   | 3.4    | 1 | K.EDVLEFISNLSVLELSELVKEFEELK.F     |
| 810.7294  | 3238.8883 | 3238.9015 | -0.0132 | 4 | 59   | 0.015  | 1 | K.TEFNIVLVDSGDKKINVIKVRALTGLGLK.E  |
| 838.6870  | 3350.7190 | 3350.7747 | -0.0558 | 2 | (63) | 0.0067 | 1 | M.AITKEDVLEFISNLSVLELSELVKEFEELK.F |
| 1118.2559 | 3351.7459 | 3350.7747 | 0.9712  | 2 | 66   | 0.0033 | 1 | M.AITKEDVLEFISNLSVLELSELVKEFEELK.F |
